# Supplementary material for: A novel prospective isolation of murine fetal liver progenitors to study in utero hematopoietic defects
Source: PLoS Genet. 2018 Jan 4;14(1):e1007127. doi: 10.1371/journal.pgen.1007127 (PMC5754050; doi:10.1371/journal.pgen.1007127)
Supplement: S5 Table — (XLSX) [file pgen.1007127.s014.xlsx]

## Sheet: DESeq2 MEPs
S5 Table. Differentially Expressed Genes in P2+ MEPs with respect to P2- MEPs (Bioconductor - DE Seq2)	Gene Symbol	baseMean	log2FoldChange	lfcSE	stat	pvalue	padj
	Sphk1	11.738	-5.41052	0.85108	-6.35724	2.05414e-10	4.50157e-08
	Atp7b	15.468	-4.68595	0.839835	-5.57961	2.41058e-08	3.67103e-06
	2810002D19Rik	5.63488	-4.07724	1.2484	-3.26596	0.00109092	0.0316191
	Tmem56	6.61938	-3.85402	0.959524	-4.0166	5.90439e-05	0.00283695
	Vopp1	7.69938	-3.70077	1.15441	-3.20577	0.001347	0.036617
	Cldn13	6.87787	-3.43664	1.02226	-3.36182	0.000774309	0.0239676
	St8sia4	9.73608	-3.40854	1.07632	-3.16684	0.00154104	0.0400179
	Aqp11	9.8723	-3.03515	1.00986	-3.00551	0.00265133	0.0600056
	Ube2cbp	7.16687	-2.88155	1.09682	-2.62719	0.00860933	0.135236
	Rhag	27.3213	-2.79511	0.876567	-3.18869	0.00142917	0.0381268
	Pklr	20.176	-2.74088	0.548255	-4.99929	5.75419e-07	5.94269e-05
	Asb17	4.60279	-2.69466	0.971381	-2.77405	0.0055364	0.100291
	Rhd	11.6955	-2.6481	1.03326	-2.56286	0.0103812	0.1552
	Rgcc	9.43584	-2.64704	0.989903	-2.67404	0.00749435	0.125161
	Plekhg5	5.88393	-2.62406	1.01708	-2.57999	0.00988024	0.149527
	Atp1b2	25.7871	-2.54782	0.748603	-3.40344	0.000665428	0.0213995
	Nqo1	7.81531	-2.50228	1.25084	-2.00048	0.0454485	0.387066
	D1Ertd622e	10.7673	-2.45703	0.804513	-3.05406	0.0022577	0.0535235
	Tspan33	10.0093	-2.17147	0.745779	-2.91168	0.00359489	0.0737444
	Slc25a21	6.14967	-2.147	0.953198	-2.25242	0.024296	0.264605
	Ccdc166	9.04548	-2.09727	1.03321	-2.02985	0.0423719	0.372881
	Emc9	17.5917	-2.03278	0.748767	-2.71484	0.00663072	0.114132
	Klhl42	11.2674	-2.01927	0.85291	-2.36751	0.0179082	0.219516
	Nxpe2	12.4636	-1.98576	1.00266	-1.98049	0.0476486	0.397884
	Gstm5	35.7966	-1.97401	0.505753	-3.90311	9.49664e-05	0.00424514
	Iqcc	10.0084	-1.94242	0.834956	-2.32638	0.0199982	0.23658
	Slc9a1	11.3467	-1.92527	0.806442	-2.38737	0.0169696	0.21167
	Tspo2	18.4866	-1.92339	0.794235	-2.42169	0.0154485	0.198009
	Prelid2	22.9533	-1.91753	0.618868	-3.09845	0.00194534	0.0474969
	Enah	6.85267	-1.83981	0.468523	-3.92683	8.60735e-05	0.00389864
	Pnpla8	10.5453	-1.83548	0.920075	-1.99492	0.0460514	0.390986
	Terf2ip	19.5012	-1.82531	0.834259	-2.18794	0.0286741	0.293436
	Arhgap39	7.25513	-1.7723	0.781313	-2.26836	0.0233074	0.259822
	Dnajc18	12.556	-1.74302	0.875582	-1.9907	0.0465143	0.393099
	Hebp1	15.6428	-1.73506	0.609045	-2.84883	0.0043881	0.08534
	Bloc1s5	18.2622	-1.73009	0.781133	-2.21485	0.0267702	0.280516
	BC052040	11.2248	-1.71098	0.831089	-2.05872	0.0395209	0.359044
	Oaf	17.0011	-1.6936	0.697856	-2.42686	0.0152303	0.196898
	Mt2	8.03856	-1.62738	0.42363	-3.84151	0.00012228	0.00528213
	Sh3bp5l	12.7789	-1.61291	0.78532	-2.05383	0.0399924	0.361396
	Tnfaip2	74.0611	-1.60988	0.584206	-2.75567	0.00585721	0.104843
	Asns	105.397	-1.59228	0.378236	-4.20976	2.55638e-05	0.00153392
	Apoo-ps	1.5935	-1.57059	0.47538	-3.30387	0.000953598	0.0283711
	Ermap	77.3215	-1.54337	0.56212	-2.74563	0.00603954	0.106821
	Ralgapb	15.1227	-1.49501	0.74984	-1.99377	0.0461773	0.391418
	Kif20a	21.4852	-1.44989	0.558392	-2.59655	0.00941654	0.144136
	Add2	20.3356	-1.43206	0.668276	-2.14292	0.0321199	0.313681
	Pla2g12a	73.7335	-1.42347	0.338166	-4.20937	2.5608e-05	0.00153392
	Aplp2	68.1827	-1.41993	0.411713	-3.44884	0.000562996	0.0189458
	Cd24a	165.908	-1.39604	0.455658	-3.06378	0.00218562	0.0519519
	Mgst3	26.0781	-1.38814	0.527833	-2.62988	0.00854138	0.13497
	Zkscan1	24.1479	-1.3606	0.590011	-2.30607	0.021107	0.24439
	Zfp637	37.8542	-1.34607	0.533332	-2.5239	0.0116062	0.167387
	Pef1	30.2942	-1.32843	0.601837	-2.2073	0.0272933	0.285151
	Ifrd1	39.5637	-1.30058	0.496378	-2.62014	0.00878937	0.137583
	Tfrc	75.3421	-1.28514	0.435071	-2.95386	0.00313823	0.0669763
	Blvrb	116.079	-1.27766	0.400387	-3.19105	0.00141756	0.0380202
	Cd320	34.2648	-1.27049	0.529028	-2.40156	0.0163254	0.205439
	Cebpb	6.24246	-1.26603	0.600074	-2.10979	0.0348768	0.329241
	Cpox	139.691	-1.26226	0.344951	-3.65924	0.00025296	0.00975471
	Fam132a	35.0014	-1.23362	0.509073	-2.42326	0.0153819	0.197654
	Ube2v2	8.47208	-1.20953	0.419045	-2.8864	0.00389676	0.0787467
	St3gal5	25.3567	-1.20559	0.514116	-2.34497	0.0190287	0.228268
	Gm6565	1.32785	-1.188	0.425844	-2.78976	0.00527465	0.0967199
	Sars2	23.7332	-1.17668	0.573776	-2.05077	0.0402889	0.363085
	Fen1	1.74199	-1.14221	0.540144	-2.11464	0.0344608	0.326938
	Sap30	30.5966	-1.13236	0.528608	-2.14216	0.0321803	0.313681
	Ifi30	26.4328	-1.10879	0.55258	-2.00657	0.0447957	0.383689
	Oat	78.4539	-1.10249	0.314516	-3.50535	0.000456008	0.0158808
	Pwp2	46.9534	-1.10138	0.489907	-2.24814	0.0245676	0.266916
	Cox6b2	34.3451	-1.09526	0.42818	-2.55793	0.0105297	0.156379
	Casp3	90.3154	-1.08553	0.319046	-3.40244	0.000667862	0.0213995
	Orc5	41.8563	-1.07332	0.482663	-2.22374	0.0261661	0.276591
	Ammecr1	22.4473	-1.07174	0.516599	-2.0746	0.0380237	0.348972
	Ubac1	49.6991	-1.06946	0.390504	-2.73867	0.00616877	0.108679
	Net1	22.1315	-1.03977	0.521264	-1.9947	0.0460754	0.390986
	Spire1	36.5525	-1.03486	0.513463	-2.01545	0.0438574	0.378903
	Klf1	134.754	-1.03007	0.485458	-2.12185	0.0338506	0.322874
	Mphosph6	47.7592	-1.00427	0.432535	-2.32182	0.0202426	0.238418
	Gm7666	1.22606	-0.994657	0.349055	-2.84957	0.0043778	0.08534
	Yars2	51.675	-0.984049	0.416533	-2.36248	0.0181532	0.221914
	Nfe2l1	21.3811	-0.959215	0.470422	-2.03905	0.0414448	0.36906
	Memo1	60.3381	-0.937456	0.331703	-2.82619	0.00471051	0.089726
	Surf2	38.1366	-0.911476	0.425338	-2.14295	0.0321174	0.313681
	Ifngr1	73.5282	-0.911318	0.36941	-2.46695	0.0136268	0.183378
	Atpaf2	39.5517	-0.910373	0.420288	-2.16607	0.0303059	0.304999
	Mesdc2	60.173	-0.906577	0.354796	-2.55521	0.0106124	0.15683
	Slc29a1	74.8819	-0.897807	0.302498	-2.96798	0.00299762	0.0647444
	Ttll12	63.3972	-0.895814	0.359752	-2.49009	0.0127711	0.177355
	Cyb5r3	67.7909	-0.87729	0.335385	-2.61577	0.0089027	0.139004
	Hmbs	116.635	-0.871273	0.28424	-3.06527	0.00217471	0.0518866
	Gm15066	3.37561	-0.868181	0.369926	-2.34691	0.0189301	0.227784
	Minpp1	76.0275	-0.829154	0.341984	-2.42454	0.0153278	0.197529
	Mpc1	8.90828	-0.827724	0.378945	-2.18429	0.0289412	0.295161
	Gclm	73.6424	-0.813274	0.30602	-2.65759	0.00787026	0.128869
	Nmd3	77.6639	-0.798341	0.369908	-2.15822	0.030911	0.308252
	Rab11b-ps2	1.72461	-0.795502	0.39679	-2.00484	0.0449798	0.384532
	Gm10110	3.36826	-0.781781	0.259545	-3.01213	0.00259425	0.0590969
	Mrpl52	139.53	-0.777379	0.16115	-4.82395	1.40743e-06	0.000123978
	Kcnn4	84.9795	-0.770302	0.341224	-2.25747	0.023979	0.262852
	Dym	63.6185	-0.754925	0.354389	-2.13022	0.0331536	0.31962
	Mt1	324.577	-0.754281	0.368181	-2.04867	0.0404942	0.36457
	Nudt19	77.8668	-0.752361	0.341147	-2.20539	0.0274268	0.28555
	Nutf2-ps1	2.82541	-0.749173	0.243544	-3.07613	0.00209707	0.0506511
	Bccip	82.021	-0.736854	0.269141	-2.7378	0.00618514	0.108754
	Prdx2	357.098	-0.735027	0.112508	-6.53312	6.44119e-11	1.60761e-08
	Gm5620	3.02855	-0.72933	0.29529	-2.46988	0.013516	0.183169
	Psmd9	46.4355	-0.722936	0.360054	-2.00786	0.0446584	0.383243
	Utp11l	87.2384	-0.716955	0.23664	-3.02973	0.00244771	0.0568091
	Car2	221.853	-0.704127	0.273266	-2.57671	0.00997466	0.150626
	Gm5837	2.07764	-0.700555	0.277188	-2.52736	0.0114923	0.166277
	Mthfd1	149.983	-0.699747	0.223783	-3.1269	0.00176658	0.0438472
	Alad	280.758	-0.689714	0.216957	-3.17903	0.00147767	0.0389279
	Bola3	102.934	-0.679868	0.166049	-4.09439	4.23279e-05	0.00219962
	Timm10b	9.39244	-0.676227	0.32534	-2.07853	0.0376609	0.347218
	Sssca1	48.3482	-0.675708	0.261403	-2.58493	0.00973985	0.148075
	Mrpl50	70.5511	-0.673773	0.334698	-2.01308	0.0441063	0.380154
	Gm7993	10.5855	-0.673093	0.248503	-2.70859	0.00675699	0.115641
	Ndufv1	95.6981	-0.672116	0.258588	-2.59918	0.00934464	0.143279
	Tdpx-ps1	10.3069	-0.671131	0.181352	-3.7007	0.000215003	0.00841975
	Gm5560	1.1877	-0.65973	0.323878	-2.03697	0.0416527	0.369812
	Cirh1a	108.987	-0.656946	0.301241	-2.1808	0.0291984	0.296773
	Mrto4	158.324	-0.653925	0.172043	-3.80093	0.000144153	0.00596948
	Phb	113.701	-0.648358	0.133665	-4.85061	1.23081e-06	0.000113393
	Atp6v1e1	72.3884	-0.64771	0.27787	-2.33098	0.0197543	0.234779
	Gm5855	1.37549	-0.644098	0.290093	-2.22031	0.0263974	0.278382
	Cdk1	153.558	-0.642354	0.3226	-1.99118	0.0464614	0.393099
	Ccdc86	72.0522	-0.629213	0.297387	-2.1158	0.0343615	0.326707
	Gstp1	68.2668	-0.627994	0.183544	-3.42149	0.000622792	0.0204226
	Gm8566	2.75114	-0.626377	0.21648	-2.89347	0.00381016	0.0772783
	Aatf	82.4879	-0.615733	0.307327	-2.00351	0.0451222	0.385383
	Lyrm4	66.9275	-0.615002	0.284345	-2.16287	0.030551	0.306021
	Psmb10	115.03	-0.609361	0.226266	-2.69312	0.00707872	0.120004
	Gm4737	21.4704	-0.607832	0.220983	-2.75058	0.00594905	0.105653
	Gm9774	1.75449	-0.594064	0.245373	-2.42107	0.0154749	0.198066
	Fth1	747.257	-0.589523	0.0815056	-7.23291	4.72766e-13	1.93082e-10
	Znhit1	28.8237	-0.575345	0.262873	-2.18867	0.0286205	0.293221
	Gart	94.8308	-0.568762	0.225723	-2.51974	0.0117443	0.167401
	Odc1	158.489	-0.567229	0.183239	-3.09557	0.00196433	0.0477014
	Coa3	91.0193	-0.56672	0.248486	-2.28069	0.0225666	0.254198
	Sdhd	241.998	-0.566197	0.164557	-3.44074	0.00058013	0.0192548
	Psmc6	128.177	-0.564027	0.221232	-2.54949	0.0107881	0.158644
	Prdx6	410.361	-0.563732	0.137781	-4.0915	4.28598e-05	0.00220054
	RP23-98C9.8	3.12609	-0.558074	0.227671	-2.45123	0.0142367	0.188668
	Mrpl21	84.7181	-0.557666	0.241492	-2.30925	0.0209295	0.243906
	Psmb7	57.2098	-0.557454	0.228119	-2.4437	0.0145377	0.19076
	Lgals1	786.077	-0.555012	0.154271	-3.59765	0.000321101	0.0118728
	Gm13835	10.8198	-0.54593	0.181178	-3.01322	0.00258494	0.0590969
	Mrpl15	146.372	-0.543108	0.192183	-2.82599	0.00471348	0.089726
	Pfas	144.174	-0.532127	0.159224	-3.34199	0.00083179	0.0254205
	Rexo2	148.825	-0.519504	0.207777	-2.50029	0.0124091	0.17367
	Gm16286	137.321	-0.515047	0.184692	-2.78868	0.0052924	0.0968476
	Eif5al3-ps	1.61543	-0.513865	0.25217	-2.03777	0.0415725	0.369465
	Glrx5	284.338	-0.508645	0.154034	-3.30216	0.000959423	0.0284502
	Rpl7l1	146.59	-0.508171	0.191056	-2.6598	0.00781876	0.128472
	Creg1	131.28	-0.505518	0.214373	-2.35812	0.0183678	0.223617
	Hnrnpab	331.304	-0.504272	0.096596	-5.22042	1.78519e-07	2.11052e-05
	Wdr12	147.17	-0.502708	0.192992	-2.60481	0.00919259	0.141673
	Farsb	112.245	-0.499873	0.245	-2.0403	0.0413207	0.36906
	Ucp2	210.115	-0.492663	0.18713	-2.63274	0.00847003	0.13497
	Eny2	65.8427	-0.489763	0.211504	-2.31562	0.0205793	0.241329
	Cdkn2aipnl	78.106	-0.489152	0.24576	-1.99037	0.0465507	0.393099
	Gm5844	13.9974	-0.482328	0.140008	-3.44501	0.000571035	0.0191446
	Timm17a	115.435	-0.478305	0.207065	-2.30993	0.0208921	0.243786
	Nsmce4a	122.489	-0.474814	0.192493	-2.46666	0.0136379	0.183378
	Prmt1	26.2502	-0.473573	0.206193	-2.29674	0.0216334	0.248189
	Cluh	104.578	-0.471125	0.221518	-2.12681	0.0334363	0.32131
	Mat2a	252.662	-0.463454	0.180924	-2.56159	0.0104194	0.155392
	Tubb4b	371.967	-0.460859	0.123293	-3.73791	0.00018556	0.00741003
	Ahcy	51.0034	-0.455205	0.192145	-2.36907	0.0178327	0.219165
	Gm8797	4.11903	-0.454489	0.212409	-2.13969	0.0323802	0.314866
	Ruvbl2	217.54	-0.454293	0.145117	-3.13052	0.00174496	0.0436726
	Ppid	165.119	-0.448322	0.170055	-2.63634	0.00838064	0.13497
	Psmc2	163.809	-0.444737	0.18873	-2.35648	0.0184492	0.224008
	Ddx21	211.458	-0.444119	0.176832	-2.51154	0.0120207	0.169821
	Ahctf1	164.32	-0.44372	0.212342	-2.08965	0.0366492	0.341563
	Phb2	291.292	-0.431907	0.097409	-4.43395	9.25219e-06	0.000634587
	Pitrm1	110.919	-0.429186	0.204982	-2.09378	0.0362798	0.339748
	Sod1	546.676	-0.420388	0.0835939	-5.02893	4.93215e-07	5.30034e-05
	Ppan	145.557	-0.420381	0.171926	-2.44513	0.0144801	0.19076
	Tomm22	174.702	-0.419537	0.208398	-2.01316	0.0440979	0.380154
	Psmb4	298.769	-0.416536	0.12313	-3.38291	0.000717231	0.0222987
	Uba2	143.364	-0.41442	0.166129	-2.49457	0.012611	0.175582
	Gm15210	5.67559	-0.412143	0.202931	-2.03096	0.0422595	0.372881
	Txn2	180.993	-0.407433	0.154761	-2.63267	0.00847173	0.13497
	Dut	473.249	-0.399069	0.123388	-3.23427	0.00121953	0.0342423
	Cyc1	302.642	-0.391127	0.128332	-3.04777	0.00230547	0.0543184
	Vdac2	243.092	-0.390042	0.137927	-2.82789	0.00468557	0.0895742
	Ruvbl1	134.261	-0.387876	0.140757	-2.75564	0.00585766	0.104843
	Hprt	167.191	-0.387731	0.195085	-1.9875	0.0468672	0.394541
	Timm23	76.2621	-0.384753	0.152738	-2.51904	0.0117676	0.167401
	St13	196.841	-0.381959	0.12338	-3.0958	0.00196286	0.0477014
	Nhp2	332.394	-0.3726	0.125617	-2.96615	0.00301554	0.064975
	Aimp1	111.464	-0.372292	0.163248	-2.28053	0.0225766	0.254198
	Taldo1	193.48	-0.372155	0.150818	-2.46757	0.0136032	0.183378
	Gm13461	8.47547	-0.371435	0.158302	-2.34638	0.0189568	0.227784
	Tomm20	163.024	-0.368694	0.138774	-2.65681	0.0078885	0.128869
	Eif3m	191.293	-0.367584	0.169193	-2.17257	0.0298127	0.301313
	Pabpc4	116.16	-0.367193	0.161428	-2.27465	0.0229269	0.256535
	Cs	228.236	-0.366954	0.134327	-2.73179	0.00629921	0.110374
	Ndufa5	138.694	-0.365913	0.176299	-2.07552	0.0379382	0.348899
	Hspe1	520.351	-0.362286	0.097801	-3.70432	0.000211956	0.00835275
	Rpl36al	283.534	-0.356686	0.0863404	-4.13116	3.6094e-05	0.00195478
	Psmc5	167.948	-0.354917	0.158518	-2.23897	0.0251576	0.270384
	Tomm40	153.548	-0.350214	0.136163	-2.57201	0.010111	0.152173
	Sdhb	213.243	-0.348481	0.137852	-2.52794	0.0114733	0.166277
	Fkbp4	394.471	-0.348372	0.116677	-2.98578	0.00282853	0.0622902
	Eif3g	293.882	-0.34735	0.116601	-2.97896	0.00289228	0.063229
	Ebna1bp2	169.997	-0.345802	0.151987	-2.2752	0.0228939	0.256486
	Phf5a	146.904	-0.336471	0.144406	-2.33004	0.0198042	0.23506
	Polr1d	174.218	-0.329183	0.136671	-2.40858	0.0160146	0.202949
	Pa2g4	319.338	-0.326942	0.123927	-2.63818	0.00833528	0.13497
	Srm	445.632	-0.326442	0.122723	-2.66	0.00781415	0.128472
	Minos1	280.473	-0.323114	0.115243	-2.80375	0.0050512	0.0943555
	Ssr2	223.619	-0.322141	0.154189	-2.08926	0.0366843	0.341563
	Atpif1	259.229	-0.320557	0.094016	-3.4096	0.000650586	0.0211794
	Hspa9	311.629	-0.31735	0.12824	-2.47466	0.0133365	0.181833
	Nolc1	333.413	-0.315057	0.145609	-2.16372	0.0304856	0.306021
	RP24-389J11.1	34.7426	-0.31074	0.120316	-2.58269	0.00980328	0.148788
	Slc25a3	510.261	-0.307488	0.0908398	-3.38495	0.000711914	0.0222633
	Psma5	206.201	-0.301694	0.148581	-2.0305	0.0423055	0.372881
	Gm15484	11.0277	-0.301516	0.138685	-2.17411	0.0296972	0.300483
	Ddx39	327.8	-0.299609	0.137441	-2.17992	0.0292637	0.297101
	Impdh2	237.395	-0.296102	0.117142	-2.52773	0.0114804	0.166277
	Eef1d	357.009	-0.290852	0.0970874	-2.99578	0.00273747	0.0610327
	Mdh2	430.505	-0.290683	0.095965	-3.02906	0.00245319	0.0568091
	Ndufa12	155.101	-0.281169	0.111436	-2.52314	0.0116313	0.167395
	Gm5611	19.5359	-0.277187	0.112392	-2.46624	0.0136539	0.183378
	Cct8	564.078	-0.275104	0.120454	-2.28389	0.0223782	0.254133
	Nop10	364.828	-0.27058	0.0915669	-2.955	0.00312669	0.0668888
	Eif2s2	237.983	-0.268577	0.0942642	-2.84919	0.00438305	0.08534
	Cct4	400.799	-0.267662	0.114735	-2.33286	0.0196555	0.234223
	Tcp1	294.738	-0.265883	0.124492	-2.13574	0.0327004	0.316609
	Ran	967.391	-0.255916	0.0766925	-3.33691	0.000847153	0.0257151
	C1qbp	499.786	-0.239703	0.103897	-2.30713	0.0210473	0.244328
	Eif3b	249.184	-0.238358	0.115328	-2.06679	0.0387543	0.35351
	Atp5g1	391.428	-0.231367	0.0880041	-2.62905	0.00856235	0.13497
	Gm9625	18.3058	-0.229414	0.111483	-2.05785	0.0396048	0.359081
	Hspd1	528.32	-0.224416	0.104923	-2.13887	0.0324459	0.315164
	Uqcr11	257.683	-0.220396	0.098458	-2.23847	0.0251901	0.27041
	Eif5a	1627.48	-0.219065	0.0643953	-3.40187	0.000669255	0.0213995
	Hsp90aa1	1746.46	-0.217629	0.0630569	-3.45132	0.000557859	0.0188435
	Eef1b2	832.221	-0.212759	0.0728592	-2.92014	0.00349876	0.0724339
	Rplp0	2257.34	-0.209372	0.0520902	-4.01942	5.83423e-05	0.0028225
	Psmb3	225.736	-0.207922	0.105059	-1.9791	0.0478049	0.398078
	Eef2	1062.48	-0.207225	0.0706625	-2.9326	0.00336132	0.070236
	Rack1	1253.31	-0.198995	0.0522129	-3.81122	0.000138283	0.00580596
	Eef1a1	3110.07	-0.197372	0.0718491	-2.74704	0.00601358	0.106572
	Bsg	281.311	-0.197046	0.0995519	-1.97933	0.047779	0.398078
	Gpx1	803.917	-0.190795	0.0870464	-2.19188	0.0283885	0.292177
	Cox6a1	344.097	-0.188827	0.0863805	-2.186	0.0288159	0.294217
	Cox4i1	523.862	-0.187475	0.0768038	-2.44096	0.0146484	0.191581
	Serbp1	787.928	-0.186733	0.069692	-2.67941	0.00737524	0.124095
	Hnrnpa1	355.625	-0.186445	0.0751725	-2.48022	0.01313	0.179837
	Eif1	442.129	-0.182729	0.076584	-2.38599	0.0170331	0.21197
	Rpl8	1101.45	-0.179488	0.0598982	-2.99655	0.00273049	0.0610286
	Hspa8	1593.15	-0.1719	0.0870398	-1.97495	0.0482734	0.400126
	Rps3	1422.4	-0.167467	0.0505656	-3.31188	0.000926728	0.0277555
	Eef1g	691.509	-0.148083	0.0654763	-2.26163	0.0237204	0.262472
	Rpl4	2276.84	-0.146338	0.0447387	-3.27094	0.00107191	0.0312697
	Rpl30	624.443	-0.134918	0.0666331	-2.02479	0.0428892	0.374762
	Rps5	1251.45	-0.134036	0.0550347	-2.43548	0.014872	0.193821
	Gm8730	99.0107	-0.131602	0.0645087	-2.04007	0.0413435	0.36906
	Npm1	2434.48	-0.128279	0.0536287	-2.39198	0.0167577	0.209705
	Rpl18	1085.77	-0.101786	0.04884	-2.08406	0.0371543	0.343801
	Fau	731.264	-0.0988379	0.0473311	-2.08822	0.0367776	0.341845
	Rpl21	830.049	0.103324	0.0512395	2.01648	0.0437496	0.378335
	Rps16	810.168	0.111328	0.046488	2.39477	0.0166306	0.208571
	mt-Nd1	2786.04	0.129314	0.0645667	2.0028	0.0451987	0.38567
	Rpsa	1440.72	0.140398	0.0470528	2.98384	0.00284654	0.0625334
	Rpl36	879.743	0.143247	0.0532782	2.68866	0.00717388	0.12116
	Rpl34	609.833	0.148762	0.0625003	2.38019	0.0173038	0.214744
	Ptma	1005.6	0.150746	0.0482469	3.12446	0.00178131	0.0440911
	Cfl1	937.779	0.160262	0.050844	3.15204	0.00162136	0.0414942
	Tpt1	461.585	0.162217	0.0739329	2.19411	0.0282276	0.29173
	Rps15a	770.374	0.170843	0.0632572	2.70077	0.00691787	0.118065
	Srsf7	454.42	0.179758	0.0853712	2.1056	0.035239	0.331542
	Rpl28	627.121	0.188125	0.0590737	3.18457	0.00144967	0.0385363
	Rpl12	705.081	0.196279	0.0751973	2.61018	0.00904943	0.140188
	Gm14303	30.1028	0.197184	0.0900124	2.19063	0.0284782	0.292431
	Ywhaz	262.224	0.200717	0.0844984	2.37539	0.0175304	0.216658
	mt-Nd5	893.495	0.211813	0.0812377	2.60732	0.00912536	0.141121
	Tma7	231.952	0.214498	0.0883569	2.42764	0.0151976	0.196759
	Gpi1	280.763	0.215647	0.10253	2.10325	0.035444	0.333122
	Rpl39	467.406	0.216542	0.0719018	3.01164	0.00259843	0.0590969
	Hmgb1	488.196	0.217958	0.0640275	3.40412	0.000663772	0.0213995
	Atp5e	236.184	0.221997	0.0937123	2.36893	0.0178398	0.219165
	Mif	577.775	0.233027	0.0648211	3.59493	0.000324476	0.0119484
	Pfn1	1272.65	0.234105	0.0560258	4.17853	2.93402e-05	0.00168988
	Tmpo	164.2	0.261117	0.131398	1.98723	0.0468971	0.394541
	Rps21	471.942	0.264147	0.0722174	3.65766	0.00025453	0.00977332
	Gng5	167.561	0.265872	0.0997074	2.66653	0.00766393	0.127519
	Tceb2	243.625	0.270027	0.101018	2.67307	0.00751612	0.125292
	Uqcrb	162.32	0.273485	0.128873	2.12212	0.0338273	0.322874
	Ndufa6	145.783	0.273608	0.136329	2.00697	0.0447526	0.383685
	Ndufa4	407.759	0.293486	0.102739	2.85661	0.0042819	0.0840018
	Uba1	222.39	0.29746	0.134244	2.21582	0.0267041	0.280469
	Hnrnpa2b1	699.819	0.297493	0.0812889	3.6597	0.000252509	0.00975471
	Arhgdia	254.47	0.302181	0.103662	2.91505	0.00355629	0.0732872
	Nucks1	199.912	0.304441	0.154049	1.97626	0.0481248	0.399665
	Paics	325.051	0.30845	0.111977	2.75458	0.00587669	0.104974
	Calm1	847.675	0.314521	0.0759579	4.14072	3.46212e-05	0.00191148
	Srrm1	356.551	0.314688	0.1117	2.81726	0.00484356	0.091813
	Gnb1	185.899	0.317209	0.139947	2.26663	0.0234128	0.260442
	Dek	314.674	0.318049	0.113367	2.80549	0.00502403	0.0940435
	Pdia3	284.894	0.318682	0.141103	2.25851	0.023914	0.262852
	Myl6	193.298	0.326353	0.103589	3.15045	0.00163021	0.0414942
	Gm23935	35.6449	0.328067	0.14975	2.19077	0.0284687	0.292431
	Psip1	103.122	0.32944	0.161287	2.04257	0.0410953	0.36777
	mt-Nd4	1187.61	0.331143	0.0946966	3.49688	0.000470729	0.0161431
	Ywhab	272.822	0.332722	0.119094	2.79378	0.0052096	0.0961155
	Tecr	181.737	0.339437	0.158346	2.14363	0.0320622	0.313681
	Dynlrb1	131.472	0.340267	0.165331	2.05809	0.039581	0.359081
	Sec61b	133.234	0.341699	0.126699	2.69694	0.00699798	0.118872
	Pdia6	202.622	0.342767	0.16125	2.12569	0.0335293	0.321516
	Ptp4a2	230.332	0.343837	0.12024	2.85959	0.0042419	0.083852
	Brk1	147.594	0.344671	0.162338	2.12317	0.0337396	0.322792
	Ap2s1	132.938	0.344688	0.13599	2.53465	0.0112558	0.164178
	Tagln2	351.966	0.353463	0.113775	3.10668	0.00189202	0.0464475
	Gm10282	7.79858	0.35733	0.175609	2.0348	0.0418707	0.37138
	Csnk1a1	152.828	0.357569	0.157909	2.2644	0.0235493	0.260901
	Bclaf1	207.622	0.359385	0.162941	2.20561	0.0274114	0.28555
	Rpn1	264.281	0.359739	0.130655	2.75334	0.00589901	0.105164
	Ssr1	203.826	0.35993	0.148478	2.42413	0.015345	0.197529
	Huwe1	164.602	0.360084	0.177991	2.02305	0.0430682	0.375142
	Dctpp1	148.948	0.361901	0.119523	3.02787	0.00246287	0.0568865
	Smarca5	138.701	0.367761	0.165099	2.22751	0.0259131	0.274935
	Chd4	158.942	0.36804	0.165394	2.22523	0.0260658	0.276181
	Shfm1	238.891	0.373245	0.110153	3.38841	0.000702987	0.0220851
	Gm9844	6.88718	0.379692	0.186847	2.03211	0.0421428	0.372881
	Mbnl1	205.755	0.379783	0.152831	2.485	0.0129553	0.177986
	Ndufv3	155.529	0.380071	0.157835	2.40803	0.016039	0.202972
	Emp3	118.94	0.385266	0.178178	2.16225	0.030599	0.306161
	Scaf11	117.309	0.38932	0.186459	2.08797	0.0368006	0.341845
	Hnrnpa3	101.024	0.392386	0.167652	2.34047	0.0192593	0.230113
	Hnrnpd	213.455	0.393876	0.15235	2.58534	0.0097283	0.148075
	Srrm2	257.859	0.395858	0.133902	2.95634	0.00311316	0.0667656
	Aes	53.6814	0.400296	0.163145	2.45363	0.0141423	0.188299
	Tram1	107.357	0.401583	0.197884	2.02938	0.0424192	0.372932
	Calr	402.327	0.401622	0.116661	3.44264	0.000576074	0.0192417
	mt-Tp	18.231	0.413042	0.204552	2.01925	0.0434608	0.3762
	Cyba	91.1646	0.415076	0.175161	2.36968	0.0178036	0.219165
	Rbm25	265.069	0.415248	0.130432	3.18365	0.00145432	0.0385458
	Txnrd1	90.5758	0.417647	0.210834	1.98092	0.0475999	0.397846
	Smc4	156.675	0.41934	0.183737	2.28229	0.0224723	0.254198
	Dbi	130.006	0.422176	0.178238	2.36861	0.0178552	0.219165
	Hsbp1	90.8943	0.422333	0.206464	2.04555	0.0408008	0.366229
	Smc6	107.585	0.428055	0.200339	2.13665	0.0326262	0.316453
	Actb	1748.99	0.434703	0.0662938	6.55722	5.48208e-11	1.40733e-08
	Tmem256	112.838	0.434826	0.154702	2.81073	0.00494296	0.093185
	Sdcbp	171.068	0.438136	0.210791	2.07853	0.0376607	0.347218
	Anapc5	226.094	0.439138	0.147514	2.97692	0.00291156	0.0633661
	C330006A16Rik	90.8744	0.440423	0.219267	2.00861	0.0445786	0.382924
	Rpl28-ps1	4.86882	0.44328	0.183941	2.40991	0.0159565	0.202499
	Cd47	320.478	0.444409	0.123739	3.59151	0.000328765	0.0120569
	Smdt1	70.3827	0.450976	0.196424	2.29594	0.0216796	0.248189
	Fmc1	47.6711	0.450983	0.216848	2.07972	0.0375514	0.347118
	Prpf4b	82.1432	0.455999	0.212363	2.14726	0.0317723	0.311994
	Coro1b	105.878	0.456611	0.203455	2.24429	0.0248138	0.267971
	Hmgn2	483.554	0.456626	0.0828734	5.50992	3.58999e-08	5.12335e-06
	Tyms	149.779	0.458059	0.200595	2.2835	0.022401	0.254133
	Ost4	41.2647	0.46007	0.143265	3.21132	0.00132129	0.0362656
	Mapk1	107.111	0.464712	0.219941	2.11289	0.03461	0.327338
	Lars2	1717.07	0.466024	0.120801	3.85777	0.000114428	0.00499095
	Akt1	74.5782	0.466449	0.230208	2.02621	0.0427432	0.374315
	Zfp106	162.976	0.466553	0.190473	2.44945	0.0143075	0.189068
	Rfc1	119.306	0.468482	0.189726	2.46926	0.0135393	0.183208
	Tm9sf3	86.5815	0.469502	0.209656	2.2394	0.0251302	0.270384
	Prrc2c	226.545	0.469751	0.14347	3.2742	0.0010596	0.0310114
	Larp4b	99.4504	0.473968	0.228749	2.072	0.0382657	0.350119
	Ccdc12	104.438	0.474463	0.188965	2.51086	0.0120438	0.16988
	Rpl39-ps	6.28015	0.475994	0.188963	2.51898	0.0117696	0.167401
	Dnmt1	190.356	0.478052	0.162489	2.94206	0.00326041	0.0690289
	Tmsb10	203.211	0.478894	0.111268	4.30397	1.67763e-05	0.00106905
	Psenen	45.7418	0.478903	0.21834	2.19338	0.0282802	0.29173
	2009-09-01	95.5136	0.479064	0.197009	2.43168	0.0150289	0.195419
	Serf2	39.0884	0.484005	0.144036	3.36031	0.000778558	0.0239676
	Vamp5	237.667	0.484316	0.147436	3.28492	0.00102012	0.0299535
	Bex3	149.468	0.487125	0.174765	2.78731	0.00531472	0.0968617
	Gm15564	119.148	0.487501	0.133359	3.65556	0.000256624	0.00981177
	Son	341.427	0.494295	0.11641	4.24616	2.17463e-05	0.00135688
	Smarcc1	148.445	0.496354	0.168795	2.94058	0.00327596	0.0690951
	Hsp90b1	236.999	0.500059	0.145347	3.44045	0.000580752	0.0192548
	Rsrp1	214.677	0.501356	0.230404	2.17599	0.0295563	0.299395
	Nomo1	90.2285	0.5107	0.25875	1.97372	0.0484139	0.400551
	2810417H13Rik	127.001	0.511179	0.232475	2.19886	0.0278882	0.289014
	Tmem160	36.3224	0.513879	0.260488	1.97275	0.0485237	0.400722
	Hmgn5	92.0603	0.516934	0.229828	2.24922	0.0244984	0.266487
	Acin1	63.8419	0.520973	0.244823	2.12795	0.0333408	0.320736
	Gm4609	1.59124	0.523852	0.252678	2.0732	0.0381533	0.349804
	Adam10	88.0133	0.524042	0.2094	2.50259	0.0123287	0.173084
	Prdx4	133.579	0.524412	0.215349	2.43518	0.0148845	0.193821
	mt-Nd2	528.226	0.527083	0.11516	4.57697	4.7175e-06	0.000356191
	Dazap1	34.4672	0.527763	0.234175	2.25371	0.0242145	0.264038
	Nsd1	83.2885	0.531042	0.264105	2.01072	0.0443548	0.381366
	Pkm	395.766	0.531523	0.119021	4.46578	7.97761e-06	0.0005644
	Pnn	104.826	0.532075	0.237076	2.24432	0.024812	0.267971
	Mir703	11.5907	0.533845	0.144754	3.68795	0.000226066	0.0087931
	Stxbp2	93.6473	0.539177	0.228951	2.35499	0.0185233	0.224302
	Nedd4	294.17	0.539522	0.121927	4.42497	9.64549e-06	0.000646752
	Lgals9	263.86	0.539676	0.202909	2.65969	0.00782129	0.128472
	Rbm14	52.9045	0.540616	0.243932	2.21626	0.026674	0.280469
	Cbx5	217.454	0.541131	0.144489	3.74513	0.000180304	0.00726471
	Wnk1	97.6417	0.54307	0.237253	2.28899	0.0220797	0.25144
	Msn	161.334	0.544235	0.201536	2.70043	0.00692492	0.118065
	Git2	74.9764	0.545828	0.223233	2.44511	0.0144809	0.19076
	Gnb2	75.5324	0.54689	0.161128	3.39413	0.000688478	0.0218586
	Tspan32	156.298	0.549831	0.223874	2.45598	0.0140499	0.187855
	Wbp11	65.9371	0.549869	0.195292	2.81563	0.00486818	0.0920854
	Rps6-ps3	1.49258	0.553516	0.251204	2.20345	0.027563	0.286192
	Ptpn7	133.972	0.55968	0.173879	3.21879	0.00128732	0.0355895
	Ncapd2	87.5752	0.559983	0.248146	2.25667	0.024029	0.262852
	Ssr3	110.122	0.561189	0.232392	2.41483	0.0157425	0.200918
	Stk16	99.9506	0.563121	0.26187	2.15038	0.0315249	0.311555
	Scand1	31.2063	0.566766	0.175464	3.23009	0.0012375	0.0344238
	Dpm3	27.9203	0.568261	0.257516	2.20671	0.0273346	0.285251
	mt-Nd6	183.87	0.572031	0.138472	4.13102	3.6115e-05	0.00195478
	Lmnb1	47.5283	0.572709	0.283303	2.02154	0.0432234	0.375652
	Nucb1	160.614	0.573002	0.180289	3.17824	0.00148173	0.0389279
	Arpc3	58.9845	0.576014	0.267479	2.15349	0.03128	0.310554
	Gm43712	1.85828	0.577619	0.271005	2.1314	0.0330566	0.31937
	Ccni	57.1353	0.580218	0.248214	2.33757	0.0194096	0.231601
	Ep400	76.6834	0.580455	0.260593	2.22744	0.0259177	0.274935
	Myl12b	84.9385	0.5822	0.237044	2.45608	0.014046	0.187855
	Ptprcap	201.528	0.585657	0.205123	2.85515	0.00430167	0.0842059
	Baz1b	146.951	0.589717	0.181232	3.25393	0.0011382	0.0325691
	Gnai2	112.371	0.589798	0.173941	3.39079	0.000696925	0.0219715
	Arpc2	320.74	0.591009	0.113648	5.20037	1.98896e-07	2.32088e-05
	Ncor1	135.945	0.593553	0.197039	3.01237	0.0025922	0.0590969
	H3f3a-ps1	4.10272	0.594835	0.274709	2.16533	0.0303627	0.305156
	Ralbp1	72.9791	0.595451	0.21899	2.71908	0.00654634	0.113403
	Gm2962	1.38292	0.596562	0.295221	2.02073	0.043308	0.375694
	Ier3ip1	28.2504	0.596731	0.272799	2.18744	0.0287106	0.293475
	Ipo11	81.1826	0.600102	0.277625	2.16156	0.0306521	0.306351
	Ptbp3	92.9208	0.602126	0.247697	2.43089	0.0150616	0.195562
	Akr1b3	66.3822	0.60337	0.262808	2.29586	0.0216838	0.248189
	Tmco1	92.3	0.603678	0.258837	2.33227	0.0196864	0.234281
	Tpp2	59.1705	0.603814	0.305599	1.97584	0.0481734	0.399665
	Selenok	76.8458	0.603858	0.257627	2.34392	0.0190822	0.228605
	mt-Rnr1	787.632	0.604983	0.101387	5.96707	2.41553e-09	4.3407e-07
	Rbm22	36.2458	0.605197	0.26782	2.25972	0.0238387	0.262852
	Ssbp4	47.4859	0.608047	0.21912	2.77495	0.00552097	0.100214
	Csk	88.5227	0.612182	0.232836	2.62925	0.00855745	0.13497
	Sept7	88.328	0.614747	0.228635	2.68877	0.00717148	0.12116
	Prkar1a	150.728	0.615376	0.15281	4.02706	5.64782e-05	0.0027779
	Flna	96.792	0.616139	0.304589	2.02285	0.0430881	0.375142
	Mtch1	45.633	0.617467	0.28959	2.13221	0.0329895	0.319064
	Gm6520	1.18778	0.618159	0.285756	2.16324	0.0305227	0.306021
	Fus	51.2337	0.618342	0.221897	2.78661	0.00532619	0.0968742
	Pum2	115.558	0.620814	0.219401	2.82959	0.0046608	0.0892906
	Ube2r2	50.6677	0.62107	0.313386	1.98181	0.0475008	0.397388
	Gm10241	1.42277	0.621714	0.288446	2.15539	0.0311311	0.309417
	Gm14680	3.65079	0.622705	0.285457	2.18143	0.0291513	0.29663
	Arpc1a	69.3369	0.622752	0.316034	1.97053	0.0487781	0.402453
	Clic1	264.324	0.630044	0.111462	5.65253	1.58103e-08	2.5367e-06
	Acat1	93.7717	0.630661	0.241589	2.61047	0.00904184	0.140188
	Rab11a	68.6259	0.632133	0.240356	2.62998	0.00853889	0.13497
	Mib1	41.3202	0.635778	0.324122	1.96154	0.0498162	0.409889
	Rad50	74.7713	0.63745	0.284026	2.24433	0.024811	0.267971
	Ppp1r35	23.7151	0.644441	0.302673	2.12917	0.0332403	0.320112
	Ech1	84.3494	0.645324	0.305064	2.11537	0.0343985	0.326713
	Rpl28-ps3	2.31848	0.646021	0.258291	2.50113	0.0123797	0.173529
	mt-Rnr2	13132.5	0.651365	0.0854457	7.62315	2.47558e-14	1.17069e-11
	Mtf2	87.5339	0.652137	0.26688	2.44356	0.0145432	0.19076
	Ist1	69.8646	0.65381	0.296695	2.20365	0.0275492	0.286192
	Zfpm1	87.2271	0.653862	0.246345	2.65426	0.00794834	0.129611
	Capns1	76.4541	0.653873	0.294885	2.21739	0.0265966	0.280153
	Atad2	57.756	0.663222	0.308756	2.14805	0.0317099	0.311994
	Prrc2a	53.4542	0.664566	0.208424	3.18852	0.00143002	0.0381268
	Lrrc58	35.3574	0.664717	0.268903	2.47196	0.0134376	0.182382
	B2m	242.997	0.666471	0.156807	4.25028	2.13505e-05	0.0013415
	Cnot3	17.3238	0.667384	0.289208	2.30762	0.02102	0.244327
	Rac2	286.61	0.671227	0.214655	3.12701	0.00176594	0.0438472
	Rexo1	42.3414	0.671663	0.328476	2.04478	0.0408763	0.366541
	Med1	55.1775	0.671996	0.317048	2.11954	0.0340451	0.324042
	Icam2	81.0151	0.679007	0.330653	2.05353	0.040021	0.361396
	Zfp422	83.0365	0.679734	0.344519	1.973	0.0484961	0.400722
	Galt	38.428	0.68193	0.324957	2.09853	0.0358587	0.336667
	Ube2d2a	36.8733	0.683153	0.228482	2.98997	0.00279009	0.0617463
	Klf13	51.8134	0.683568	0.328901	2.07834	0.0376781	0.347218
	Rere	41.0566	0.683857	0.333217	2.05229	0.0401416	0.362121
	Lmo2	304.064	0.694166	0.198936	3.48939	0.000484125	0.0165394
	Mapk14	106.156	0.694689	0.226656	3.06495	0.0021771	0.0518866
	Ythdc1	45.1221	0.697979	0.273398	2.55298	0.0106805	0.157577
	Tcea1-ps1	1.71576	0.701119	0.318235	2.20315	0.027584	0.286192
	Grk2	86.6552	0.703396	0.233615	3.01092	0.00260461	0.0590969
	Plscr3	61.261	0.705022	0.312818	2.25378	0.0242103	0.264038
	Grb2	76.0915	0.705376	0.223193	3.16039	0.00157556	0.0406965
	Rnh1	73.7032	0.705556	0.30389	2.32175	0.0202463	0.238418
	Spns2	71.5215	0.708309	0.324651	2.18175	0.0291277	0.29663
	Ogt	72.6401	0.708824	0.310068	2.28603	0.0222525	0.253087
	Ppdpf	76.7235	0.708981	0.227329	3.11875	0.00181621	0.0448314
	Wdr1	117.856	0.71168	0.246647	2.88543	0.00390885	0.0787467
	1700020I14Rik	55.8231	0.71297	0.299697	2.37897	0.0173611	0.215158
	Fam133b	54.6579	0.713609	0.271321	2.63013	0.00853532	0.13497
	Thoc2	82.8615	0.713735	0.291073	2.45208	0.0142032	0.188502
	Rsu1	122.078	0.713986	0.237923	3.00091	0.00269173	0.0606145
	Tspan3	58.1926	0.719101	0.350132	2.0538	0.0399952	0.361396
	Gm5921	1.55195	0.720502	0.298555	2.4133	0.0158089	0.200949
	Hp1bp3	92.9917	0.732361	0.251212	2.91532	0.00355328	0.0732872
	Etnk1	58.3355	0.73592	0.367761	2.00108	0.0453834	0.386878
	Nrros	91.9711	0.743743	0.345545	2.15238	0.0313677	0.311044
	Slc39a1	40.263	0.743965	0.229073	3.24771	0.00116336	0.0329741
	Gabarapl2	27.2042	0.747648	0.366529	2.03981	0.0413693	0.36906
	Itga4	80.8237	0.748148	0.235166	3.18136	0.00146586	0.0387376
	Nktr	73.7384	0.748601	0.314785	2.37813	0.0174005	0.215349
	Gm5518	1.58994	0.749036	0.31118	2.40709	0.0160804	0.20321
	Efhd2	57.5055	0.749198	0.284394	2.63437	0.00842936	0.13497
	Ccnl2	76.089	0.75805	0.300038	2.52651	0.0115201	0.166412
	Birc6	72.4636	0.760031	0.26	2.9232	0.00346459	0.0721977
	Arhgdib	240.039	0.760899	0.15964	4.76634	1.87602e-06	0.000159019
	S100a10	112.299	0.762462	0.202626	3.76289	0.000167959	0.00685961
	Fam65a	100.606	0.763085	0.23619	3.23081	0.00123439	0.0344238
	Gtf3a	20.1415	0.765685	0.280764	2.72715	0.00638838	0.111672
	Ier2	138.152	0.775476	0.237159	3.26986	0.00107603	0.0312883
	Inpp5d	57.5071	0.778316	0.343478	2.26599	0.0234522	0.260468
	Iqgap1	93.7059	0.781397	0.279278	2.79792	0.00514327	0.0954798
	Tpm3	327.811	0.782766	0.101993	7.67471	1.65791e-14	8.27574e-12
	Clint1	89.5514	0.784486	0.242942	3.22911	0.00124178	0.0344363
	Pycard	28.9353	0.784663	0.366312	2.14206	0.0321885	0.313681
	Gm3608	11.0338	0.78757	0.380662	2.06895	0.0385508	0.35237
	Atf7ip	94.1543	0.78771	0.294395	2.67569	0.00745755	0.125011
	Gmpr2	59.3954	0.792009	0.361661	2.18992	0.0285302	0.29263
	Cmtm7	218.586	0.798401	0.163973	4.86909	1.12112e-06	0.000107163
	Ctnnb1	91.497	0.799487	0.234603	3.40783	0.000654828	0.0212405
	Cdk6	334.991	0.803702	0.176612	4.55066	5.34791e-06	0.000397115
	Cap1	48.2648	0.80815	0.30759	2.62736	0.00860496	0.135236
	Gm5526	2.54858	0.809587	0.243864	3.31982	0.000900742	0.0271374
	Cul3	62.9809	0.816321	0.346528	2.35571	0.0184871	0.224166
	Micu2	47.1673	0.816755	0.402157	2.03093	0.0422617	0.372881
	Fam212a	68.0029	0.817356	0.351379	2.32614	0.0200112	0.23658
	Malat1	191.656	0.825876	0.167594	4.92785	8.31406e-07	8.20899e-05
	Brd3	102.195	0.8306	0.189377	4.38597	1.1547e-05	0.000762867
	Mlec	157.522	0.830998	0.176806	4.70006	2.60085e-06	0.000204988
	4932438A13Rik	31.2979	0.832933	0.424398	1.96263	0.0496897	0.409598
	Sh3bgrl3	125.71	0.834909	0.155857	5.35689	8.46648e-08	1.10248e-05
	H2-K1	85.4646	0.835677	0.279625	2.98857	0.0028029	0.0618774
	Cpsf4	42.9826	0.835731	0.342093	2.44299	0.0145661	0.190782
	Csrp1	34.3723	0.839589	0.342237	2.45324	0.0141576	0.188299
	Ktn1	47.6184	0.8428	0.369385	2.28163	0.0225113	0.254198
	Arpc1b	199.995	0.843931	0.13983	6.03541	1.58556e-09	2.96797e-07
	Itm2b	184.542	0.844358	0.213382	3.95702	7.58907e-05	0.00346131
	Cggbp1	53.9693	0.844633	0.359723	2.34801	0.0188742	0.22763
	Kmt2e	68.4041	0.849437	0.330664	2.56888	0.0102027	0.153205
	Kcnq1ot1	75.2954	0.849864	0.344434	2.46742	0.0136089	0.183378
	Myo1c	34.39	0.850737	0.406082	2.09499	0.0361719	0.339253
	Lyn	40.3724	0.855462	0.429662	1.99101	0.0464797	0.393099
	Cep192	37.418	0.859711	0.427218	2.01235	0.0441834	0.380256
	Cbfa2t3	136.205	0.860675	0.25048	3.43611	0.000590137	0.0194226
	Nfe2	129.508	0.860818	0.214409	4.01483	5.94879e-05	0.00284308
	B230219D22Rik	32.7778	0.862706	0.428597	2.01286	0.0441292	0.380154
	Pola1	121.649	0.86378	0.261237	3.30651	0.000944674	0.028199
	Cotl1	35.9964	0.865736	0.29889	2.89651	0.00377343	0.0767065
	Dcun1d1	38.185	0.869656	0.290655	2.99205	0.00277108	0.0614769
	Ubald1	30.2542	0.874305	0.387414	2.25677	0.0240223	0.262852
	S100a11	25.1228	0.876472	0.419193	2.09085	0.0365412	0.341184
	Rock2	46.7767	0.885045	0.369619	2.39448	0.0166439	0.208571
	Ripk3	59.2639	0.892182	0.305275	2.92255	0.00347175	0.0721977
	Cntrl	64.0365	0.893529	0.399992	2.23387	0.0254919	0.272998
	Pim1	12.0261	0.894735	0.389297	2.29833	0.0215428	0.247839
	Qk	31.4026	0.898796	0.441048	2.03787	0.0415634	0.369465
	Tab2	60.5402	0.898901	0.356953	2.51826	0.0117936	0.167401
	2310009A05Rik	9.13412	0.905442	0.419496	2.15841	0.0308962	0.308252
	Maf1	63.3717	0.906749	0.358704	2.52785	0.0114764	0.166277
	Etfb	24.6995	0.912095	0.15011	6.07619	1.23073e-09	2.40393e-07
	Ddx6	25.4464	0.912312	0.459856	1.98391	0.0472661	0.395793
	Hells	105.032	0.913181	0.255141	3.57912	0.00034475	0.0125408
	Ttc14	33.0997	0.922378	0.455009	2.02717	0.0426455	0.373902
	Atrx	149.025	0.926649	0.231077	4.01013	6.0686e-05	0.00288499
	Ppp1r15a	54.0646	0.92788	0.449958	2.06215	0.0391939	0.356434
	BC005537	78.7099	0.92904	0.243506	3.81526	0.00013604	0.00573859
	Cux1	48.8356	0.936859	0.37153	2.52163	0.0116814	0.167395
	Casp8ap2	54.6492	0.943741	0.423167	2.23019	0.025735	0.274619
	Igf1r	38.8648	0.944366	0.391329	2.41323	0.015812	0.200949
	Acot7	55.6826	0.94499	0.360141	2.62394	0.00869187	0.136294
	Gpbp1l1	14.7364	0.95037	0.468568	2.02825	0.0425352	0.373586
	Ppp2r5a	74.4383	0.952027	0.280704	3.39157	0.000694947	0.0219715
	Gm6483	1.66979	0.953925	0.452454	2.10834	0.0350019	0.330002
	Foxp1	86.0686	0.956983	0.250029	3.82749	0.000129456	0.00556539
	Kmt2a	55.7427	0.958039	0.346414	2.76559	0.00568206	0.102723
	Pttg1ip	62.9694	0.961106	0.424049	2.2665	0.0234209	0.260442
	Gm15915	162.513	0.966604	0.45728	2.11381	0.0345313	0.326938
	Reep5	51.4913	0.969939	0.341848	2.83734	0.00454917	0.0880777
	Sharpin	29.7148	0.975024	0.41331	2.35906	0.0183212	0.22336
	Vav1	48.4334	0.977846	0.400012	2.44455	0.0145035	0.19076
	Leng8	27.2728	0.979854	0.452385	2.16597	0.0303132	0.304999
	Pxn	20.6984	0.982174	0.447781	2.19343	0.0282767	0.29173
	Rcn2	43.746	0.983824	0.426775	2.30525	0.0211524	0.2446
	Hif1a	41.2718	0.985951	0.374884	2.63002	0.00853797	0.13497
	Hist1h1b	54.3495	0.986944	0.463166	2.13087	0.0331003	0.319448
	Ccnd3	102.228	0.988428	0.203655	4.85344	1.21338e-06	0.000113393
	Gatad1	44.6978	0.988932	0.311918	3.17048	0.00152186	0.0397497
	Oser1	14.6273	0.990242	0.430245	2.30158	0.021359	0.246039
	Zdhhc20	25.7838	0.99222	0.506212	1.96009	0.0499856	0.41077
	Ppic	68.1864	0.992533	0.323616	3.06701	0.00216211	0.0518041
	Was	41.8911	0.994526	0.316277	3.14448	0.00166384	0.0419932
	Golga4	43.2469	0.994751	0.429479	2.31618	0.0205485	0.241329
	Taok3	124.367	0.994969	0.223786	4.44606	8.74576e-06	0.000613912
	Srpk2	28.1196	0.99528	0.492766	2.01978	0.0434059	0.376087
	Vps13a	16.4646	0.996901	0.436975	2.28137	0.0225268	0.254198
	Tln1	255.902	0.997731	0.141771	7.03763	1.95543e-12	7.32064e-10
	Tspan4	35.3868	1.00039	0.397223	2.51845	0.0117873	0.167401
	Bmyc	4.68223	1.00392	0.370041	2.71299	0.00666786	0.114552
	Ticrr	38.0284	1.0055	0.461569	2.17845	0.0293727	0.297871
	Zfp148	35.5206	1.00711	0.48112	2.09327	0.036325	0.339748
	Zfand5	60.7912	1.00716	0.2949	3.41526	0.000637215	0.0208195
	Mfsd1	42.9314	1.00798	0.468493	2.15154	0.0314332	0.311044
	Cwf19l2	21.7458	1.01271	0.473255	2.13989	0.0323639	0.314866
	Kdm2a	28.6973	1.01456	0.40783	2.48771	0.0128568	0.17772
	Lpin2	56.1545	1.01802	0.409598	2.4854	0.0129406	0.177986
	Smarcd1	20.4701	1.02277	0.357912	2.8576	0.00426863	0.0839248
	Gipc1	50.0731	1.02329	0.361408	2.8314	0.00463448	0.0891667
	Macf1	65.1732	1.02531	0.320958	3.19452	0.00140063	0.0376786
	N4bp2	38.992	1.02761	0.437979	2.34626	0.018963	0.227784
	Cbfb	36.3004	1.03063	0.402387	2.56128	0.0104286	0.155392
	Usp8	34.5908	1.03149	0.518832	1.9881	0.0468001	0.394541
	Pip4k2a	29.1286	1.03404	0.507064	2.03927	0.0414228	0.36906
	Zfp385a	10.1503	1.03451	0.44511	2.32416	0.0201168	0.237516
	Dock2	57.1448	1.04268	0.450635	2.31379	0.0206792	0.241931
	Plxnc1	64.406	1.04274	0.391398	2.66414	0.00771847	0.128189
	Nfkb1	56.9155	1.04849	0.339098	3.09198	0.00198824	0.048152
	Hist1h1e	51.4505	1.05185	0.414573	2.53719	0.0111746	0.163258
	Fermt3	248.085	1.05204	0.132146	7.96125	1.7031e-15	1.10535e-12
	Rasgrp2	36.8817	1.05271	0.400369	2.62934	0.00855515	0.13497
	Hcls1	37.2127	1.05473	0.388165	2.71721	0.00658339	0.113753
	Vasp	32.426	1.05474	0.358558	2.94161	0.00326514	0.0690289
	Heg1	42.1696	1.05661	0.439902	2.40193	0.016309	0.205439
	Zfp362	23.0452	1.062	0.42368	2.50661	0.0121894	0.171665
	Slc2a1	55.9231	1.06204	0.331422	3.20449	0.00135302	0.036617
	Zcchc11	20.9045	1.06791	0.461257	2.31522	0.0206009	0.241329
	Phf3	37.7923	1.06886	0.391288	2.73165	0.00630184	0.110374
	Tceal8	35.0199	1.07022	0.421096	2.54152	0.0110372	0.161514
	Krit1	27.1747	1.07117	0.51357	2.08573	0.0370027	0.342752
	Etv6	44.4392	1.07213	0.419467	2.55593	0.0105903	0.156761
	Atg101	31.5403	1.07609	0.443903	2.42416	0.015344	0.197529
	Rap2b	14.7196	1.0762	0.364612	2.95164	0.00316095	0.0673013
	Mir6236	58.3001	1.07654	0.18598	5.78848	7.10275e-09	1.22727e-06
	Cd37	43.2053	1.07996	0.428481	2.52044	0.0117209	0.167401
	Bcor	38.0142	1.08179	0.411367	2.62975	0.00854488	0.13497
	Hipk2	35.9879	1.08602	0.500328	2.17063	0.0299595	0.302456
	Tpst2	66.5298	1.0891	0.339343	3.20944	0.00132994	0.0363207
	Prkar2b	87.0603	1.08953	0.265219	4.10805	3.99013e-05	0.00212138
	Gm4322	3.14352	1.09287	0.482602	2.26454	0.0235408	0.260901
	Ctdspl2	34.2186	1.10486	0.415835	2.65697	0.00788457	0.128869
	Ifitm2	32.3252	1.10735	0.199093	5.56197	2.66743e-08	3.99448e-06
	Tpm3-rs7	3.86599	1.10786	0.257088	4.30927	1.63793e-05	0.0010512
	Ip6k1	31.1472	1.1079	0.485682	2.28112	0.0225412	0.254198
	Itsn2	41.4535	1.10794	0.424306	2.61119	0.00902264	0.140188
	Ubqln2	12.0344	1.11018	0.48744	2.27757	0.0227521	0.255216
	Hipk1	55.5933	1.11144	0.346144	3.21091	0.00132313	0.0362656
	Ash1l	41.6881	1.11225	0.46434	2.39534	0.0166049	0.208571
	Sash3	64.1907	1.11249	0.436867	2.54651	0.0108806	0.159742
	Acap1	48.314	1.11425	0.562888	1.97953	0.0477566	0.398078
	Sptlc2	33.742	1.11554	0.550839	2.02516	0.0428504	0.374762
	Nckap1l	70.5202	1.11678	0.368014	3.0346	0.00240857	0.0560648
	Akap9	64.01	1.1192	0.384317	2.91217	0.00358924	0.0737444
	Blm	43.1284	1.11973	0.4114	2.72175	0.00649375	0.113294
	Wdfy3	24.6541	1.14031	0.489715	2.32851	0.0198851	0.235709
	Arhgap15	38.5173	1.14398	0.459662	2.48875	0.0128192	0.177474
	Tsen34	26.0304	1.14705	0.554952	2.06694	0.0387396	0.35351
	Phc1	27.1608	1.15063	0.509947	2.25637	0.0240472	0.262852
	Hist1h1c	29.7043	1.15169	0.497889	2.31314	0.0207149	0.242033
	Dnmt3a	60.0165	1.15231	0.311428	3.70008	0.00021553	0.00841975
	Mettl3	19.4217	1.15272	0.534469	2.15675	0.0310251	0.308914
	Slc22a3	37.4874	1.1578	0.463619	2.49731	0.0125139	0.174592
	Chd8	34.0127	1.167	0.327297	3.56557	0.00036306	0.0129964
	Abcc1	30.2945	1.16854	0.553889	2.1097	0.0348846	0.329241
	Frmd8	32.1879	1.16965	0.507923	2.30281	0.0212896	0.245555
	Chd9	33.196	1.17088	0.524624	2.23184	0.0256257	0.274103
	Laptm5	147.53	1.17303	0.231573	5.06548	4.07371e-07	4.54794e-05
	Rn7sk	3.92085	1.17491	0.549958	2.13637	0.0326491	0.316453
	Tmem181a	9.35479	1.18161	0.511869	2.30842	0.0209759	0.24413
	Wdfy4	29.2271	1.18236	0.534274	2.21303	0.0268958	0.281326
	Camk2g	22.3673	1.18386	0.584023	2.02708	0.0426544	0.373902
	Mob1b	19.4747	1.18811	0.517466	2.29601	0.0216752	0.248189
	Il17ra	45.3039	1.19374	0.432426	2.76058	0.00576993	0.103686
	Il2rg	30.3473	1.19492	0.398061	3.00184	0.00268355	0.060582
	Zfp326	17.6795	1.19658	0.596501	2.00599	0.0448573	0.38385
	Lonp2	41.7559	1.19671	0.415982	2.87684	0.00401679	0.0803805
	Myh9	44.8388	1.19732	0.264947	4.51907	6.21118e-06	0.00045006
	Gm12245	2.20959	1.20393	0.537285	2.24077	0.0250413	0.269779
	Tnik	24.6366	1.20766	0.607873	1.9867	0.046956	0.394668
	Rnf130	44.4649	1.20782	0.427679	2.82414	0.00474076	0.0900544
	Pdlim7	24.4304	1.20922	0.430859	2.80654	0.00500762	0.0939322
	Zfp451	27.9871	1.20948	0.579467	2.08724	0.0368667	0.341845
	Ltbr	18.2827	1.2112	0.612903	1.97617	0.0481352	0.399665
	Diaph1	72.758	1.21503	0.305966	3.97114	7.153e-05	0.00329588
	Rb1cc1	22.0815	1.21547	0.614935	1.97658	0.0480895	0.399665
	Prkacb	32.1856	1.21591	0.471315	2.57982	0.00988527	0.149527
	Sugp2	33.5996	1.21741	0.483761	2.51654	0.0118513	0.167691
	S100a13	21.2907	1.22293	0.476842	2.56464	0.0103282	0.154664
	Sipa1l1	20.3477	1.23271	0.531793	2.31803	0.0204476	0.240473
	Fam98c	4.37871	1.23375	0.603999	2.04263	0.0410887	0.36777
	Cdk13	10.2995	1.23518	0.4543	2.71887	0.00655051	0.113403
	Serinc1	31.1833	1.24558	0.488421	2.55021	0.0107657	0.158574
	Pafah2	35.5713	1.24577	0.543129	2.2937	0.0218079	0.249292
	Cdkn2d	29.1664	1.24875	0.582733	2.14292	0.0321198	0.313681
	Cenpb	27.3905	1.24884	0.466955	2.67443	0.00748564	0.125161
	Tsc22d4	71.1306	1.25254	0.228923	5.47144	4.46406e-08	6.22041e-06
	Unc119	92.5986	1.26489	0.305529	4.14001	3.47289e-05	0.00191148
	Gp5	21.61	1.27032	0.56618	2.24367	0.024854	0.268083
	Slc9a3r1	76.0272	1.27726	0.308595	4.13895	3.48895e-05	0.00191148
	Gpsm3	4.49121	1.27977	0.47059	2.7195	0.00653805	0.113403
	Eng	37.6384	1.28658	0.515056	2.49793	0.0124921	0.174559
	Acap2	19.2319	1.28761	0.562318	2.28982	0.0220318	0.251213
	Ramp1	61.0171	1.28855	0.550121	2.3423	0.0191653	0.229294
	H2-T23	24.5731	1.29001	0.567872	2.27166	0.0231069	0.258228
	Depdc1b	16.8658	1.29072	0.635821	2.03001	0.0423551	0.372881
	Vim	283.104	1.29677	0.293734	4.41478	1.01113e-05	0.000672964
	Tmod3	37.7258	1.29852	0.435629	2.98079	0.00287501	0.0630048
	Gm17066	4.7451	1.30217	0.347811	3.74391	0.000181181	0.00726747
	Dapp1	103.311	1.30543	0.308959	4.22526	2.38666e-05	0.00147891
	Ogfrl1	37.017	1.31336	0.40381	3.25241	0.0011443	0.0326397
	Rasa3	39.8597	1.31366	0.453316	2.89789	0.00375686	0.0765428
	Tcp11l1	5.48128	1.31476	0.58237	2.25759	0.023971	0.262852
	Tle4	14.5709	1.31879	0.644055	2.04763	0.0405962	0.365003
	Tgfbr3	53.0315	1.32284	0.420459	3.14619	0.00165414	0.0418662
	Plec	43.8002	1.32666	0.460027	2.88388	0.00392806	0.0789567
	Tmem98	18.2184	1.32866	0.673026	1.97416	0.0483637	0.400505
	Dnmt3b	124.33	1.33149	0.254789	5.22584	1.73365e-07	2.07691e-05
	Nbeal2	18.2093	1.34027	0.630495	2.12575	0.0335244	0.321516
	Junb	69.5105	1.34275	0.338116	3.97127	7.14913e-05	0.00329588
	Ddah2	41.025	1.3428	0.462932	2.90064	0.00372399	0.0760456
	Ptp4a3	86.6151	1.3516	0.284119	4.75716	1.96337e-06	0.000164762
	Atp13a2	77.4435	1.35191	0.285025	4.74314	2.10433e-06	0.000171886
	Tuba4a	187.629	1.35268	0.191786	7.05306	1.75029e-12	6.83755e-10
	Snx9	22.9509	1.36008	0.500952	2.71499	0.00662777	0.114132
	Dock11	24.843	1.36432	0.673907	2.02449	0.0429193	0.374762
	Mov10	23.9595	1.36826	0.613767	2.22929	0.0257948	0.274628
	Pik3cd	56.0222	1.37385	0.3311	4.14936	3.33402e-05	0.00186488
	Ppt2	6.43888	1.3801	0.636984	2.16661	0.0302647	0.304999
	Arhgef2	66.0759	1.38641	0.264686	5.23793	1.62391e-07	1.97173e-05
	St3gal1	26.0918	1.38983	0.606464	2.2917	0.0219231	0.250291
	Fam98b	11.6319	1.39256	0.583388	2.38702	0.0169854	0.21167
	Csrp2	27.6753	1.39346	0.672311	2.07265	0.0382052	0.349922
	Homer3	10.9454	1.3949	0.559256	2.49421	0.0126239	0.175582
	1810058I24Rik	53.0028	1.39629	0.382345	3.6519	0.000260308	0.00991046
	Flcn	28.3465	1.42137	0.660543	2.15183	0.0314111	0.311044
	Igfbp4	67.8701	1.42424	0.515763	2.76142	0.00575508	0.103626
	Mia3	26.9277	1.43307	0.509904	2.81046	0.00494705	0.093185
	Xpo7	26.6258	1.43583	0.501396	2.86367	0.00418763	0.0830592
	Adgrg1	207.506	1.4413	0.164461	8.76376	1.88836e-18	2.12086e-15
	Tbc1d2b	15.9497	1.44134	0.722609	1.99463	0.0460828	0.390986
	Med13l	20.3194	1.44752	0.693382	2.08762	0.0368322	0.341845
	Zfp687	21.8186	1.45449	0.534709	2.72014	0.00652536	0.113403
	Skap2	39.8898	1.45566	0.500817	2.90657	0.00365413	0.074789
	Twf2	66.4366	1.45723	0.323457	4.50517	6.63211e-06	0.000476716
	Sptbn1	56.9933	1.46398	0.453139	3.23076	0.00123463	0.0344238
	Ocrl	19.9466	1.47082	0.718401	2.04735	0.0406236	0.365003
	Vezf1	29.3003	1.47278	0.535455	2.75053	0.00594994	0.105653
	Runx1	45.9138	1.47348	0.322715	4.56589	4.9739e-06	0.00037242
	Ttc7b	18.1697	1.47565	0.60148	2.45337	0.0141526	0.188299
	Rap1b	150.662	1.47677	0.291607	5.06426	4.09998e-07	4.54794e-05
	Rps6ka1	48.7844	1.48101	0.498932	2.96836	0.00299391	0.0647444
	Itga5	19.8674	1.4895	0.67258	2.21461	0.0267872	0.280516
	Calcrl	13.676	1.4927	0.713143	2.09312	0.0363381	0.339748
	Zmiz1	42.5507	1.50492	0.414208	3.63324	0.000279888	0.0105663
	Mfng	47.9404	1.50777	0.47921	3.14637	0.0016531	0.0418662
	E2f7	18.1137	1.51354	0.612118	2.47263	0.0134125	0.182316
	Phf19	14.5521	1.52391	0.738231	2.06427	0.0389923	0.355321
	Prkcd	29.091	1.52545	0.625987	2.43687	0.014815	0.193478
	Mast4	17.0181	1.5276	0.62138	2.45839	0.013956	0.187156
	Sp110	28.9395	1.53357	0.58729	2.61126	0.009021	0.140188
	Apoe	526.32	1.53686	0.281345	5.46255	4.69351e-08	6.38957e-06
	Arid1b	19.809	1.53941	0.534692	2.87906	0.00398864	0.0799954
	Ralb	21.5918	1.55731	0.584801	2.66298	0.00774521	0.128301
	Erbin	20.1139	1.55873	0.491371	3.1722	0.00151286	0.03963
	Elmo1	52.2771	1.56246	0.624139	2.50338	0.0123014	0.17297
	Bin2	110.628	1.56365	0.288645	5.4172	6.0539e-08	8.11855e-06
	Dtx3l	8.41754	1.57279	0.778042	2.02148	0.0432303	0.375652
	Treml2	29.6398	1.57429	0.490319	3.21075	0.00132389	0.0362656
	Osbpl8	28.4402	1.57604	0.449507	3.50615	0.000454643	0.0158808
	Wls	32.1522	1.57987	0.627572	2.51743	0.0118216	0.167535
	Fbxo21	17.811	1.58351	0.71226	2.22321	0.0262013	0.276638
	Gltscr1	11.7613	1.58594	0.641131	2.47366	0.0133736	0.182064
	Myo7a	26.277	1.58942	0.740113	2.14754	0.0317507	0.311994
	Lrrfip2	26.4187	1.59784	0.556902	2.86917	0.00411555	0.0821121
	Sgms1	28.581	1.5994	0.578834	2.76314	0.00572478	0.103288
	Socs2	25.6383	1.6045	0.620205	2.58704	0.00968031	0.14767
	Elf1	75.6687	1.60627	0.299467	5.36376	8.15058e-08	1.07695e-05
	Mgat5	12.5199	1.60871	0.796147	2.02062	0.0433188	0.375694
	Entpd7	6.137	1.62563	0.719235	2.26022	0.0238077	0.262852
	Bex1	19.907	1.62682	0.615314	2.64389	0.00819585	0.133164
	Fam107b	45.5238	1.62756	0.543781	2.99305	0.00276205	0.0614282
	Vamp2	8.93236	1.63569	0.787448	2.0772	0.0377829	0.347827
	Slc44a2	39.1135	1.63848	0.502475	3.26082	0.0011109	0.0320946
	Eml4	44.6835	1.65502	0.396418	4.17494	2.98068e-05	0.00170207
	Dennd4b	13.6486	1.65938	0.772061	2.14928	0.031612	0.311783
	Erc1	14.4868	1.66117	0.800703	2.07464	0.0380201	0.348972
	Jak3	22.3369	1.66201	0.559019	2.97307	0.00294833	0.0639873
	Tcirg1	21.3003	1.66406	0.632565	2.63066	0.00852193	0.13497
	Parvg	45.7152	1.6644	0.532248	3.12712	0.00176531	0.0438472
	Uba7	8.07484	1.66922	0.825085	2.02309	0.0430637	0.375142
	Itga2b	33.9744	1.67096	0.692192	2.41401	0.0157781	0.200949
	Gxylt1	13.2909	1.67648	0.854457	1.96204	0.0497582	0.409787
	Dtnbp1	63.6332	1.67649	0.409608	4.09292	4.25969e-05	0.00219962
	Klk8	52.6825	1.68505	0.417029	4.04059	5.33163e-05	0.00266137
	Gm2a	17.5562	1.68835	0.849295	1.98794	0.0468178	0.394541
	Abca2	31.0758	1.69084	0.558998	3.02477	0.00248825	0.0573255
	Ptpre	50.5577	1.69307	0.381537	4.4375	9.10094e-06	0.00062944
	Abcc5	13.1833	1.69364	0.788652	2.14751	0.0317528	0.311994
	Gstm1	21.7808	1.69808	0.702715	2.41646	0.0156723	0.200307
	Id1	20.5571	1.70739	0.803935	2.12379	0.0336879	0.322692
	Lat	25.509	1.70801	0.641687	2.66175	0.00777367	0.128394
	Akap13	70.0098	1.70953	0.382591	4.46829	7.88472e-06	0.000562256
	Cdk19	13.6884	1.71627	0.75329	2.27837	0.0227048	0.255003
	Myo1g	31.8397	1.7217	0.649367	2.65135	0.00801704	0.130495
	Maged2	25.3566	1.72897	0.774972	2.23101	0.0256806	0.274364
	Tnfrsf1a	16.0794	1.73039	0.696082	2.48591	0.0129222	0.177986
	Grcc10	4.28622	1.73191	0.436996	3.96323	7.3943e-05	0.00338968
	Mc5r	14.998	1.73814	0.67989	2.5565	0.0105731	0.156761
	Gfod2	9.76358	1.74115	0.876651	1.98613	0.0470185	0.394823
	Tes	32.2775	1.74299	0.498412	3.49708	0.000470381	0.0161431
	Kctd12	11.0249	1.7487	0.733569	2.38382	0.0171338	0.212929
	Fscn1	12.5497	1.7488	0.850977	2.05505	0.0398741	0.361158
	Tmem176a	27.3352	1.76062	0.72667	2.42286	0.0153988	0.197654
	Hist2h2ac	3.54453	1.76546	0.835034	2.11423	0.0344953	0.326938
	Mbnl2	21.7299	1.76833	0.576128	3.06934	0.00214536	0.0516784
	Atp2a3	28.2606	1.78421	0.493754	3.61356	0.000302025	0.0113071
	Cntln	9.80867	1.7862	0.802904	2.22468	0.0261027	0.276246
	Gnal	4.03799	1.78828	0.900663	1.98551	0.0470878	0.395036
	Igf2bp2	28.4931	1.78935	0.564962	3.16719	0.00153918	0.0400179
	Adam15	10.5331	1.79012	0.792729	2.25817	0.0239348	0.262852
	Itgb2	37.9079	1.794	0.500671	3.58318	0.000339435	0.0123977
	Dusp2	44.5133	1.79568	0.599039	2.99759	0.00272121	0.0609727
	A930005H10Rik	7.64193	1.7968	0.76212	2.35763	0.0183921	0.223617
	Bmp2k	27.434	1.80054	0.442615	4.06795	4.74278e-05	0.00240756
	Gm9835	1.5408	1.80597	0.363159	4.97295	6.59418e-07	6.65715e-05
	Ece1	10.2689	1.80722	0.840564	2.15001	0.0315542	0.311555
	Dag1	13.6806	1.81636	0.741549	2.44941	0.0143089	0.189068
	Nrip1	38.2276	1.81924	0.443679	4.10035	4.12532e-05	0.00218035
	Setd7	13.0984	1.83229	0.818993	2.23725	0.0252701	0.270945
	Itga6	33.8807	1.84373	0.544791	3.38429	0.000713616	0.0222633
	Lxn	17.0258	1.84854	0.67481	2.73936	0.00615598	0.108667
	Rabgap1l	55.6662	1.84936	0.439104	4.21168	2.53481e-05	0.00153392
	Abcg1	37.0712	1.8567	0.440754	4.21256	2.5249e-05	0.00153392
	Rogdi	11.8394	1.85983	0.791889	2.3486	0.0188443	0.227575
	Tmem40	44.7701	1.86171	0.464618	4.00697	6.15027e-05	0.00290843
	Ikzf2	27.6431	1.86403	0.724579	2.57256	0.0100949	0.152173
	Fos	199.774	1.86594	0.447513	4.16957	3.05179e-05	0.00172455
	Pecam1	8.52762	1.8663	0.830901	2.24611	0.0246967	0.267672
	Srgn	205.468	1.86914	0.183537	10.184	2.33663e-24	6.99821e-21
	Jup	5.98039	1.87751	0.946119	1.98443	0.0472077	0.395673
	Supt3	14.6094	1.88145	0.673832	2.79216	0.00523568	0.0962017
	Emilin2	67.9281	1.88324	0.467696	4.02665	5.65783e-05	0.0027779
	Ubash3b	18.6552	1.88847	0.722045	2.61545	0.00891111	0.139004
	Dlk1	7.51645	1.89312	0.580987	3.25846	0.00112019	0.0321563
	Pam	6.13136	1.91382	0.814123	2.35077	0.0187346	0.226555
	Col18a1	24.5052	1.92222	0.672565	2.85804	0.00426267	0.0839248
	Arhgap30	39.5817	1.92935	0.484686	3.98061	6.87375e-05	0.0032167
	Zfp36	50.2198	1.9308	0.442341	4.36496	1.27146e-05	0.000833877
	Wipf1	11.3689	1.93375	0.683238	2.83027	0.00465089	0.0892906
	Emid1	23.8855	1.93486	0.679763	2.84638	0.00442199	0.0858133
	Cpne3	31.1207	1.93497	0.507127	3.81555	0.000135879	0.00573859
	Prtn3	25.5871	1.9359	0.683249	2.83338	0.00460586	0.0888061
	Zfp865	3.54586	1.94945	0.681801	2.85926	0.00424626	0.083852
	Fyb	23.5212	1.9705	0.615574	3.20108	0.00136915	0.0369423
	Smim5	31.1402	1.97446	0.707115	2.79227	0.00523399	0.0962017
	Cd9	22.8392	1.98604	0.679716	2.92188	0.00347931	0.0721977
	Elk3	15.6671	1.99312	0.756915	2.63321	0.00845809	0.13497
	Emilin1	47.8658	1.99852	0.57844	3.45502	0.000550249	0.0186565
	Bcl2l1	27.0733	2.0043	0.571532	3.50689	0.000453379	0.0158808
	Hoxa9	31.6416	2.00586	0.771113	2.60125	0.00928852	0.142662
	Slc18a2	15.4507	2.01076	0.772371	2.60337	0.00923136	0.142027
	Rin3	17.1411	2.01655	0.664473	3.0348	0.00240693	0.0560648
	Mfge8	15.383	2.02428	0.847746	2.38784	0.0169476	0.21167
	Ccdc180	8.12439	2.02796	0.962962	2.10596	0.0352075	0.331542
	Pcdh7	18.5417	2.03338	0.708816	2.8687	0.0041216	0.0821121
	Gimap1	34.3258	2.03366	0.71691	2.8367	0.00455828	0.0880777
	Grn	31.7812	2.04339	0.588075	3.47471	0.000511412	0.0174055
	Ptpn18	32.7725	2.04658	0.317405	6.44785	1.13449e-10	2.68248e-08
	Dusp3	13.3675	2.04662	0.755443	2.70916	0.00674542	0.115641
	Plcl2	14.1103	2.04688	0.826923	2.4753	0.0133124	0.181781
	Zeb2	49.6617	2.04987	0.407689	5.02804	4.95524e-07	5.30034e-05
	Rgs18	32.0911	2.05006	0.512467	4.00036	6.32458e-05	0.0029752
	Dusp6	12.4088	2.0576	1.01145	2.03431	0.04192	0.371451
	Nav1	13.8565	2.06675	0.988612	2.09056	0.0365677	0.341184
	Nrgn	7.95643	2.06733	0.504552	4.09735	4.17904e-05	0.00219583
	Ninl	11.7385	2.06751	0.933169	2.21558	0.0267203	0.280469
	Rab32	23.5285	2.06837	0.699647	2.9563	0.0031135	0.0667656
	Gmfg	121.159	2.07302	0.265875	7.79696	6.3414e-15	3.7985e-12
	Dclre1b	12.8489	2.0733	0.743687	2.78787	0.00530563	0.0968617
	Limd2	120.316	2.08535	0.402523	5.18069	2.21061e-07	2.54646e-05
	Spi1	36.6835	2.09226	0.580897	3.60178	0.000316044	0.0117341
	Cited2	33.6476	2.0933	0.441057	4.7461	2.0738e-06	0.000170946
	Utrn	31.2197	2.10532	0.717832	2.93289	0.00335826	0.070236
	Tbc1d16	7.82013	2.12585	1.03057	2.06279	0.039133	0.356241
	Smim14	11.3367	2.1366	0.860751	2.48225	0.0130556	0.179091
	H1fx	1.95155	2.14374	0.520018	4.12243	3.74892e-05	0.00201701
	Slc35d3	6.09122	2.15379	1.0146	2.12281	0.0337701	0.322792
	Ecm1	11.0443	2.15526	0.818494	2.6332	0.00845841	0.13497
	Lman2l	13.1666	2.1572	0.909895	2.37082	0.0177488	0.219057
	Psmb9	17.4416	2.1634	0.709883	3.04754	0.00230726	0.0543184
	Exoc3l2	12.7158	2.17071	0.965785	2.24761	0.0246011	0.266957
	Muc13	59.7866	2.18284	0.469251	4.65174	3.29144e-06	0.000254945
	Arrb2	11.1627	2.18495	0.455043	4.80163	1.57383e-06	0.00013729
	Klf6	16.6324	2.1896	0.868043	2.52246	0.0116536	0.167395
	Ksr1	8.46377	2.19066	1.02068	2.14627	0.0318515	0.31243
	Cmtm3	16.9445	2.20525	0.836042	2.63773	0.00834633	0.13497
	Tnfrsf13b	22.6718	2.21517	0.792446	2.79536	0.0051842	0.0959811
	Cd48	146.488	2.22532	0.461267	4.82437	1.40443e-06	0.000123978
	Orai1	20.4723	2.23271	0.668599	3.33938	0.000839658	0.025574
	Dhrs7	17.0436	2.23462	0.910975	2.453	0.014167	0.188299
	P2ry1	9.70307	2.23601	0.947769	2.35924	0.0183126	0.22336
	Arhgap4	16.094	2.24509	0.762293	2.94517	0.00322775	0.068561
	Manea	7.79762	2.25226	0.936134	2.40592	0.0161319	0.203575
	Tmsb4x	565.615	2.25236	0.216437	10.4065	2.31488e-25	1.03996e-21
	Tap1	12.2325	2.25307	1.01141	2.22764	0.0259044	0.274935
	Acvr1b	6.86334	2.27027	1.03422	2.19516	0.028152	0.291413
	Psmb8	30.161	2.30348	0.506698	4.54606	5.46593e-06	0.000402552
	Litaf	19.085	2.31237	0.761322	3.03731	0.00238697	0.0558513
	Ahi1	9.75129	2.31244	1.05475	2.1924	0.0283507	0.292123
	Egr1	68.9259	2.32216	0.554065	4.19112	2.77578e-05	0.00161951
	Rgl2	18.5181	2.32766	0.657017	3.54277	0.000395941	0.0140614
	Syk	39.9328	2.32882	0.501865	4.64034	3.47843e-06	0.000267126
	F2r	75.9653	2.34828	0.368145	6.37867	1.78632e-10	4.01252e-08
	Mef2c	91.3979	2.36266	0.404434	5.8419	5.16083e-09	9.09216e-07
	Tmem176b	83.0167	2.39351	0.590173	4.0556	5.00049e-05	0.00251002
	Capn2	16.6504	2.39834	0.837306	2.86435	0.00417862	0.0830592
	Snx10	15.3018	2.40446	0.715574	3.36018	0.000778914	0.0239676
	Ncoa3	35.8914	2.40934	0.390117	6.17594	6.57714e-10	1.34308e-07
	Lrp12	7.53995	2.40997	1.1362	2.12109	0.0339141	0.323137
	Cyp4f16	5.51942	2.41378	1.18818	2.0315	0.0422044	0.372881
	Pglyrp2	15.3914	2.42255	0.929562	2.60612	0.00915749	0.141375
	Marveld1	7.73933	2.43186	1.09088	2.22925	0.025797	0.274628
	Il27ra	9.2111	2.43685	1.22063	1.99639	0.0458914	0.390468
	Tm6sf1	7.05883	2.45887	0.911737	2.69691	0.00699871	0.118872
	Rcsd1	18.072	2.46058	0.878281	2.80159	0.0050852	0.0947936
	Pdcd4	33.6608	2.46352	0.385568	6.38933	1.66614e-10	3.83853e-08
	Arhgap32	6.5408	2.46385	1.08136	2.27847	0.0226987	0.255003
	Scarf1	9.69054	2.46854	1.08691	2.27116	0.023137	0.258244
	Slc25a24	7.2296	2.46981	0.927592	2.66261	0.00775375	0.128301
	Ebi3	18.9926	2.48638	0.65874	3.77445	0.000160361	0.0065792
	Plcb2	34.5894	2.48934	0.70035	3.55443	0.000378806	0.0135062
	Lrmp	43.8424	2.49162	0.492497	5.05916	4.21117e-07	4.61431e-05
	Pkd1l3	7.75651	2.49719	1.10628	2.25728	0.0239909	0.262852
	Ifi47	30.2722	2.50432	0.80747	3.10144	0.00192584	0.0471489
	Itgal	56.9615	2.51304	0.518383	4.84785	1.2481e-06	0.000113393
	Zyx	94.8428	2.52531	0.380168	6.6426	3.08193e-11	8.39126e-09
	Rab37	31.2353	2.54694	0.613892	4.14884	3.34163e-05	0.00186488
	Arhgap25	18.7519	2.552	0.837473	3.04726	0.00230936	0.0543184
	Gm45353	5.93795	2.55915	0.816918	3.13268	0.00173216	0.0434733
	Tet1	11.0454	2.56813	1.01601	2.52767	0.0114821	0.166277
	Dok2	63.3544	2.57829	0.449215	5.73953	9.49398e-09	1.55097e-06
	Tec	9.51194	2.58249	1.09241	2.36404	0.0180768	0.22128
	Nr4a2	5.19676	2.58399	0.964077	2.68027	0.00735622	0.124007
	Grik5	7.37029	2.58505	0.881289	2.93326	0.00335428	0.070236
	Coro2a	11.1019	2.58627	0.793442	3.25957	0.00111583	0.0321338
	Gata2	76.0202	2.59031	0.394389	6.5679	5.10299e-11	1.34854e-08
	Zfp467	8.03825	2.59148	1.12505	2.30345	0.0212537	0.245456
	Mpo	93.1332	2.62475	0.699833	3.75053	0.000176461	0.00714191
	Tpm4	42.8946	2.6308	0.690769	3.8085	0.00013981	0.00584276
	Fhl3	2.1871	2.63456	0.640031	4.11631	3.84993e-05	0.00205903
	Coro1a	233.986	2.64851	0.389845	6.79375	1.09259e-11	3.63589e-09
	Ift57	13.5942	2.65502	0.880462	3.01548	0.0025657	0.0589586
	Atp8b2	8.29431	2.66071	1.05493	2.52217	0.0116633	0.167395
	Pear1	16.5021	2.6891	0.830149	3.2393	0.00119824	0.0337497
	Mndal	13.4544	2.69264	0.761451	3.53619	0.000405936	0.0143596
	Celf2	117.071	2.69506	0.323554	8.32955	8.11524e-17	6.07629e-14
	Prkag2	8.80275	2.69679	0.831912	3.24167	0.0011883	0.033575
	Myct1	15.4355	2.69806	0.899736	2.99872	0.00271115	0.0608991
	Jam3	9.86966	2.70752	0.808133	3.35034	0.000807117	0.0247507
	Itih5	12.1082	2.71041	0.939216	2.88582	0.00390394	0.0787467
	Rai14	8.96475	2.72225	1.09486	2.48639	0.0129047	0.177986
	Gpr171	9.03232	2.72231	1.12075	2.42901	0.0151402	0.196298
	Emb	16.769	2.72362	1.26299	2.15648	0.0310461	0.308914
	Fam189b	7.55113	2.74901	1.07028	2.56851	0.0102137	0.153205
	4933439C10Rik	6.19848	2.75098	0.980162	2.80666	0.00500584	0.0939322
	Phf21a	11.4475	2.75678	0.739895	3.72591	0.000194616	0.00773726
	S1pr1	10.6077	2.789	1.04197	2.67666	0.00743603	0.124884
	Rab27b	10.8437	2.87094	0.909664	3.15604	0.00159925	0.041055
	Slfn9	23.5619	2.88287	0.686738	4.19792	2.6938e-05	0.00158195
	Plcg2	41.8388	2.89504	0.611013	4.7381	2.1573e-06	0.000173066
	Npl	15.4566	2.8973	0.917548	3.15766	0.00159041	0.0409451
	Rbp1	79.0188	2.90862	0.634254	4.58589	4.52047e-06	0.000344207
	Tubb6	9.15652	2.92256	1.12865	2.58944	0.00961325	0.146896
	Obsl1	8.75296	2.93185	1.04752	2.79885	0.00512856	0.095404
	Cand2	20.2688	2.9329	0.767258	3.82257	0.000132069	0.00562391
	Dock1	8.72807	2.93327	1.14653	2.55839	0.010516	0.156379
	Clec4d	19.8212	2.94269	0.855679	3.43902	0.000583834	0.0192858
	Gem	15.3473	2.94427	1.15757	2.54349	0.0109751	0.160866
	Vav3	17.1007	2.94856	0.839397	3.51271	0.00044356	0.015629
	Bin1	20.0333	2.96988	0.782113	3.79725	0.000146309	0.0060302
	Adamts10	10.1107	2.97329	0.891297	3.33591	0.000850193	0.0257205
	Myom1	7.76367	2.98214	1.067	2.7949	0.00519163	0.0959811
	Afap1l1	30.8166	3.01414	0.621776	4.84764	1.24941e-06	0.000113393
	Dennd2d	19.7418	3.03637	0.960795	3.16027	0.00157622	0.0406965
	Hlf	15.5833	3.03833	0.964165	3.15126	0.00162568	0.0414942
	Cdkn1a	9.3257	3.04997	0.92507	3.29701	0.000977197	0.028882
	Stat4	8.66864	3.05257	0.777514	3.92606	8.63471e-05	0.00389864
	D130058E05Rik	11.3929	3.05599	0.746451	4.09403	4.23945e-05	0.00219962
	Grap	12.1612	3.05879	0.941085	3.25028	0.0011529	0.0327812
	Plxnd1	6.88147	3.06668	0.760393	4.03302	5.50647e-05	0.00273346
	Slit2	7.24671	3.08423	1.23907	2.48916	0.0128047	0.177474
	Ptprc	33.4332	3.11067	0.591517	5.2588	1.44999e-07	1.78467e-05
	Anxa1	10.4846	3.11932	1.35244	2.30644	0.0210861	0.24439
	Gimap5	13.1507	3.13056	0.808589	3.87163	0.000108109	0.00476155
	Cyth4	20.7466	3.13718	0.654738	4.7915	1.65542e-06	0.000143018
	Sptan1	37.1307	3.15157	0.741309	4.25136	2.12475e-05	0.0013415
	Ctla2a	144.637	3.16722	0.529405	5.9826	2.19598e-09	4.02671e-07
	Lst1	31.5669	3.18273	0.669285	4.75541	1.98044e-06	0.000164762
	Ppp1r18	17.5802	3.19085	0.604976	5.27434	1.33237e-07	1.66268e-05
	F2rl3	18.8191	3.21816	0.768755	4.1862	2.83666e-05	0.00164435
	Treml1	20.866	3.23327	0.746232	4.3328	1.47226e-05	0.000951671
	Srgap3	6.12556	3.24085	1.30923	2.47538	0.0133093	0.181781
	Plekha2	8.6189	3.26043	0.900061	3.62245	0.000291826	0.0109709
	Plxdc2	15.6616	3.26282	0.961154	3.39469	0.000687067	0.0218586
	Ldhb	12.7814	3.29602	1.02851	3.20465	0.00135229	0.036617
	Fxyd5	87.1021	3.31852	0.512475	6.47548	9.45085e-11	2.29502e-08
	Ica1	21.1016	3.31978	0.786486	4.22103	2.43192e-05	0.00149663
	Med12l	10.3122	3.33849	0.897073	3.72153	0.000198019	0.00783787
	Gimap6	93.6247	3.34737	0.770843	4.34248	1.40886e-05	0.00091729
	Inpp4a	6.5439	3.37615	1.08636	3.10776	0.0018851	0.0464046
	Peg13	10.6381	3.37953	0.80496	4.19837	2.68837e-05	0.00158195
	Cnrip1	16.6956	3.3804	0.850998	3.97228	7.11886e-05	0.00329588
	Gng11	23.525	3.38435	0.746262	4.53507	5.75856e-06	0.000420656
	Tek	12.9686	3.38857	1.13832	2.97681	0.00291265	0.0633661
	Adgrg3	19.9275	3.4069	0.847684	4.01907	5.8429e-05	0.0028225
	Prdm11	11.345	3.44546	0.915946	3.76164	0.000168801	0.00686279
	Fam49a	8.26845	3.45077	1.13481	3.04083	0.00235927	0.0553474
	Hdac5	6.30013	3.46967	1.05479	3.28942	0.00100393	0.0295747
	BC028528	5.0099	3.4948	0.968284	3.60927	0.000307062	0.0114479
	Fli1	42.0235	3.5092	0.501664	6.99513	2.65013e-12	9.52457e-10
	Gm43984	6.05483	3.59181	1.22243	2.93827	0.00330051	0.0694499
	Rbpms2	17.4186	3.59306	0.917907	3.91441	9.0626e-05	0.00407137
	Mtss1l	5.60998	3.59962	1.17363	3.06707	0.00216166	0.0518041
	P2rx1	28.4472	3.60123	0.759736	4.7401	2.1361e-06	0.000172908
	Meis1	56.6718	3.61143	0.433166	8.33729	7.60114e-17	6.07629e-14
	Cd84	16.2074	3.61966	0.929859	3.89269	9.9137e-05	0.00440963
	Ptgs1	26.4475	3.63263	0.679951	5.34249	9.16799e-08	1.17678e-05
	Nfam1	13.4903	3.76481	0.896669	4.19865	2.68506e-05	0.00158195
	Mpl	137.992	3.78098	0.490043	7.71562	1.20399e-14	6.36347e-12
	Sh2d3c	11.692	3.79007	0.984429	3.85002	0.00011811	0.00512666
	Fcer1g	22.0923	3.81278	0.782828	4.87052	1.11306e-06	0.000107163
	Ifitm3	73.4152	3.82557	0.633422	6.03953	1.54564e-09	2.95481e-07
	Gcnt2	19.297	3.83072	0.771952	4.96239	6.96324e-07	6.95163e-05
	Tnfaip8l2	8.767	3.84778	1.07701	3.57267	0.000353364	0.0126999
	Fgd5	15.5985	3.8542	1.10167	3.4985	0.000467877	0.0161431
	Ndn	14.9109	3.89622	1.24175	3.13768	0.00170289	0.0428584
	Ckap4	10.8527	3.94222	1.08279	3.64079	0.000271808	0.0103046
	Ifi203	17.2906	3.96108	0.789473	5.01738	5.23813e-07	5.53702e-05
	Slamf1	35.0914	4.00003	0.800915	4.99433	5.90403e-07	6.02815e-05
	Ncf4	14.6833	4.00247	0.904196	4.42655	9.5754e-06	0.000646752
	Arhgef6	37.8601	4.02836	0.762107	5.28581	1.25147e-07	1.58373e-05
	Dennd1c	5.44195	4.0288	1.21382	3.3191	0.000903071	0.0271374
	Sirpa	19.2296	4.03608	0.866994	4.65526	3.23573e-06	0.000252809
	Tie1	18.1009	4.04194	0.738927	5.47001	4.50002e-08	6.22041e-06
	Nfic	8.98918	4.04704	0.809072	5.00207	5.67176e-07	5.92567e-05
	Lcp2	23.4007	4.09327	0.671477	6.09591	1.08816e-09	2.17269e-07
	Abr	8.52483	4.13219	1.0622	3.89022	0.000100155	0.00443295
	Pstpip1	11.9475	4.13492	1.06895	3.8682	0.000109642	0.00480555
	Myo1f	10.5465	4.22419	1.05086	4.01973	5.8265e-05	0.0028225
	Adgrl4	79.6092	4.2639	0.771544	5.52645	3.26777e-08	4.81326e-06
	Ctla2b	14.1753	4.30993	0.892523	4.82892	1.37273e-06	0.000123339
	Hoxa7	12.3037	4.31396	0.915552	4.71187	2.45454e-06	0.000195169
	Alox5ap	24.2401	4.3193	0.542635	7.95986	1.7223e-15	1.10535e-12
	Fes	10.7231	4.37119	1.1429	3.82464	0.000130964	0.00560337
	Btg2	13.3299	4.38674	1.25187	3.50415	0.000458062	0.0158907
	Angpt1	29.4083	4.53155	0.53424	8.48224	2.20898e-17	2.2053e-14
	Nrep	9.62906	4.5808	0.959966	4.77184	1.82553e-06	0.000156213
	Esam	27.9057	4.58148	0.944363	4.8514	1.22593e-06	0.000113393
	Rab31	26.6439	4.60426	0.818158	5.62759	1.82747e-08	2.88067e-06
	Sorbs3	9.14642	4.60576	0.93958	4.90194	9.48954e-07	9.26778e-05
	Rnase6	14.1174	4.64245	1.14034	4.07111	4.67904e-05	0.0023887
	Cd200r1	9.42735	4.67196	1.1193	4.17399	2.99307e-05	0.00170207
	Mpdz	6.371	4.69958	1.23644	3.8009	0.000144171	0.00596948
	Gpsm1	7.0546	4.74713	1.32698	3.57738	0.000347055	0.0125737
	Vipr2	8.42782	4.76271	1.33282	3.57341	0.000352367	0.0126999
	Gucy1a3	15.2751	4.85401	1.19583	4.0591	4.92627e-05	0.00248666
	Gm8995	11.5862	4.89298	1.10504	4.42789	9.51577e-06	0.000646752
	Plek	34.6493	5.0093	0.740915	6.76096	1.37084e-11	4.24725e-09
	Mycn	41.8548	5.02302	0.677787	7.41092	1.25423e-13	5.63461e-11
	Pdgfb	8.19219	5.06488	1.14142	4.43736	9.10709e-06	0.00062944
	Inpp1	9.97271	5.15558	0.93571	5.5098	3.59233e-08	5.12335e-06
	Il16	22.6281	5.16955	0.764407	6.76282	1.35333e-11	4.24725e-09
	Cd93	45.1418	5.19831	0.58388	8.90305	5.43311e-19	9.7633e-16
	Col4a1	14.3132	5.22717	1.02109	5.1192	3.06834e-07	3.48975e-05
	Csf2rb	19.4272	5.24979	0.842113	6.23407	4.5447e-10	9.49631e-08
	Tespa1	28.7337	5.30427	0.917028	5.78419	7.28617e-09	1.23521e-06
	Lyz2	37.3908	5.35951	0.858243	6.24475	4.24468e-10	9.08059e-08
	Pbx1	40.633	5.40145	0.776027	6.96039	3.39323e-12	1.17262e-09
	Serpina3g	74.2261	5.51214	0.818545	6.73406	1.64989e-11	4.94142e-09
	Cd34	115.614	5.62186	0.673464	8.34768	6.96156e-17	6.07629e-14
	Rbpms	28.6342	5.69238	0.64468	8.82979	1.04875e-18	1.50604e-15
	Tnfsf14	10.1137	5.94332	1.05746	5.62039	1.90528e-08	2.95155e-06
	Mmrn1	15.4683	5.95413	0.88482	6.7292	1.70601e-11	4.94468e-09
	Sla	27.0723	6.04403	0.826817	7.30999	2.67155e-13	1.14304e-10
	Cd79b	23.7585	6.09036	0.785731	7.7512	9.10275e-15	5.11177e-12
	Il12a	18.3188	6.19332	1.0755	5.75857	8.48307e-09	1.41149e-06
	Tuba8	12.0625	6.55667	0.983256	6.66833	2.5873e-11	7.26466e-09
	Nr4a1	26.5575	6.6063	0.74925	8.81722	1.17332e-18	1.50604e-15
	Gp9	20.5809	7.54805	0.797346	9.46646	2.8948e-21	6.50245e-18
	Cd69	11.4568	24.283	1.62535	14.9402	1.80509e-50	1.62188e-46
